# Supplementary material for: Active learning for efficient navigation of multi-component gas adsorption landscapes in a MOF
Source: Royal Society of Chemistry journal article supplement (doi:10.1039/d3dd00106g), 2023-01-01
Supplement: d3dd00106g1.pdf [file d3dd00106g1.pdf]

Supporting Information for:

# Active learning for efficient navigation of multi-component gas adsorption landscapes in a MOF

Krishnendu Mukherjee,<sup>1</sup> Etinosa Osaro,<sup>1</sup> and Yamil J. Colón\*<sup>1</sup>

<sup>1</sup>Department of Chemical and Biomolecular Engineering, University of Notre Dame, Notre Dame, IN, 46556, USA

\*Corresponding author: ycolon@nd.edu

## GP Kernel selection process

Here is the performance metric to compare different kernel combination's performance and find the best kernel/combination of kernels for the GPs. This metric is calculated after 500 iterations of Active learning using the following equation.

$$\text{Performance} = \frac{\overline{100 - AC_1} + \overline{100 - AC_2} + \overline{AC_{CL}} + \overline{MRE_1} + \overline{MRE_2}}{5} \quad (1)$$

This parameter (shown in the y-axis of figure S1, S3, and S7-S9) is a lumped-variable for five different parameters. Each of these five parameters for the kernel shows a desired performance from the Active learning protocol. A low value of all these parameters are desirable. Also, each term in the above equation in performance calculation corresponds to the mean of accuracy over 500 iterations, not just a point at 500 iterations. This is done to find the cumulative performance of the kernel combinations.

The first two terms shows absolute distance of the accuracy from the desired value of 100% (for the dual GPs) for gas species 1 and 2 in the mixture. Further the distance parameter is normalized with maximum and minimum values, so that final parameter is within 0 and 1.

$$\overline{100 - AC_i} = \left| \frac{(100 - AC_i) - \min(100 - AC_i)}{\max(100 - AC_i) - \min(100 - AC_i)} \right| \quad (2)$$

The third parameter is the difference between accuracies of the species of C and L normalized by maximum and minimum value of the parameter.

$$\overline{AC_{CL}} = \left| \frac{(|AC_C - AC_L|) - \min(|AC_C - AC_L|)}{\max(|AC_C - AC_L|) - \min(|AC_C - AC_L|)} \right| \quad (3)$$

The fourth and the fifth shows the mean relative errors. Also, the first three accuracy-based parameters are normalized with respect to maximum and minimum values, while the MRE-based parameters are scaled with maximum value only. This is done to because many kernels were too close to the lowest MREs and hence they would be very close to 0 if we had used the min-max scaling. We just scaled it with respect to maximum value so that the MRE distribution remains comparable with accuracy distribution in the visualization.

$$\overline{MRE}_i = \frac{MRE_i}{\max_j(MRE_j)} \quad (4)$$

Thus, we get a final performance-based parameter, which tells us a how well a kernel combination is performing with respect to other combinations. Therefore, the final parameter encapsulates whether the GPs are close to 100% accuracy, how GPs accuracies are close to one another, and how low the MREs are (all of them are given an equal weight). We select the kernel/kernel combination with the lowest value of this performance metric.

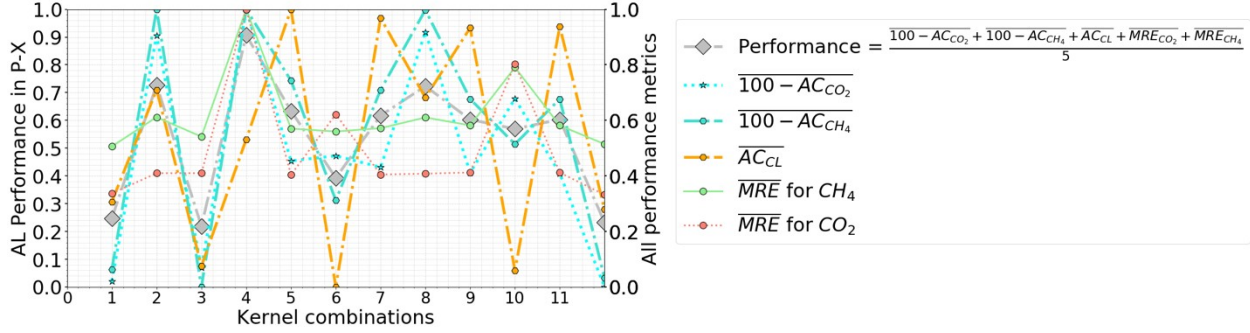

Figure S1. Performance plots for kernel optimization for CO<sub>2</sub>-CH<sub>4</sub> mixture after 500 iterations of active learning (all the parameters are averaged over all the iterations leading to 500<sup>th</sup> iteration). The x-axis shows the kernel index combination. For reference, indices 1, 2 and 3 are: rational quadratic (RQ), Matérn (M), and radial basis function (RBF). The next indices (from 4 to 12) follows the combination of either of these two but not three at a time. Index 4 would be RQ + RQ, index 5 RQ + M, 6 would be RQ + RBF, and so on. The y-axis on the right shows the performance metrics, which encapsulates five entities from the dual-GPs. First two terms quantify how close the accuracies of kernels to 100. The third, how close the two accuracies are to one another. Fourth and fifth ones finds the mean relative errors (MREs) for both the GPs. In essence, the optimization is done to find the kernel combination which gives the minimum of this lumped-performance parameter. Here, we find the Index 3 (RBF) to be the best in the performance, followed closely by dual-RBF at Index 12, and then Index 1 by a single RQ.

Figure S1 shows the performance of all kernels for CO<sub>2</sub>-CH<sub>4</sub> mixture. We find that Index 3 (a single RBF) outperforms all the other combinations. Hence, we go forward with RBF for the final fit. Also, for the kernel optimizations of Xe-Kr and H<sub>2</sub>S-CO<sub>2</sub> systems, we found RQ (Index 1) to be the best performer. It is interesting to note that single kernels performed well and particularly RBF which has only two parameters. In figure S1, the RBF and RQ kernels have the lowest value of the parameters,  $|100 - AC_{CO_2}|$  and  $|100 - AC_{CH_4}|$ . This shows these kernels candidates showed a higher accuracy after 500 iterations. Their MREs were just marginally lower than other combination, however their accuracies were much closer which provided a boost to the performance. We have added the kernel optimization results for the other two mixtures in the figure S3.

## RASPA Input file for GCMC simulations

- The values of features P,  $X_1/X_2$ , and T were changed according with the states
- The molecules names and definition corresponds to the RASPA forcefield files and folder location. The same input file was used for all the three mixtures, only the adsorbate forcefield was changed in simulation.

```
SimulationType      MonteCarlo
NumberOfCycles      50000
NumberOfInitializationCycles 5000
PrintEvery          1000

ContinueAfterCrash  no
WriteBinaryRestartFileEvery 2000
UseChargesFromCIFFile  yes

Forcefield          GenericMOFs
RemoveAtomNumberCodeFromLabel yes

Framework 0
FrameworkName Cu-BTC
UnitCells 1 1 1
ExternalTemperature T
ExternalPressure P

Component 0 MoleculeName      CO2/H2S/Xe
      MoleculeDefinition      TraPPE
      MolFraction              X1
      TranslationProbability    0.5
      RotationProbability       0.5
      ReinsertionProbability    0.5
      RegrowProbability         0.5
```

IdentityChangeProbability 1.0  
NumberOfIdentityChanges 2  
IdentityChangesList 0 1  
SwapProbability 1.0  
CreateNumberOfMolecules 0

Component 1 MoleculeName methane/CO2/Kr  
MoleculeDefinition TraPPE  
MolFraction X<sub>2</sub>  
TranslationProbability 0.5  
ReinsertionProbability 0.5  
RegrowProbability 0.5  
RotationProbability 0.5  
IdentityChangeProbability 1.0  
NumberOfIdentityChanges 2  
IdentityChangesList 0 1  
SwapProbability 1.0  
CreateNumberOfMolecules 0

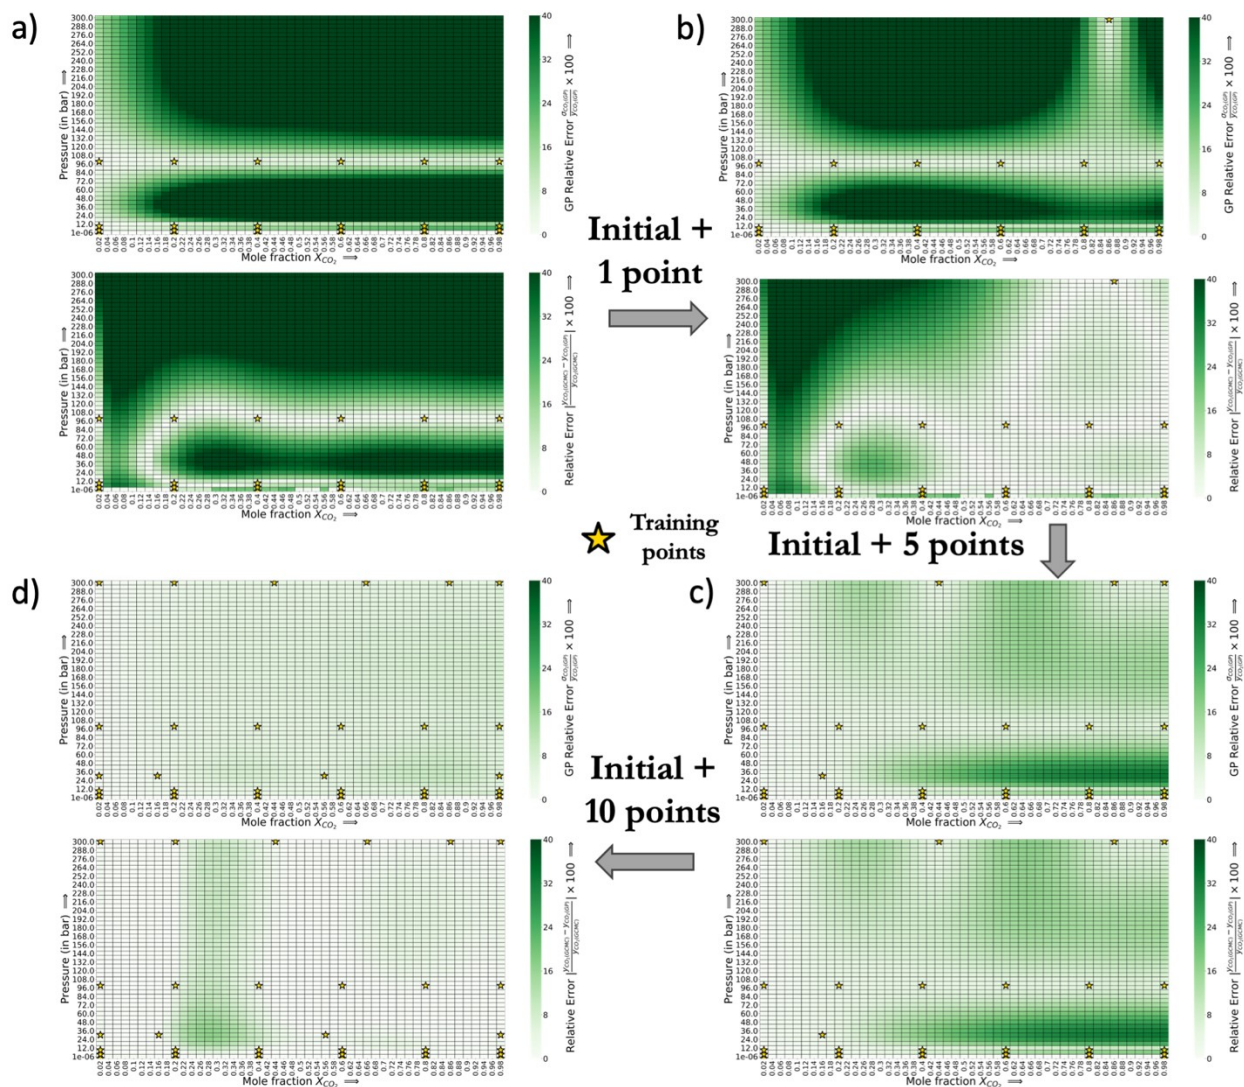

Figure S2. Error maps for GP relative error and the absolute relative error (true error on comparison with GCMC) for CO<sub>2</sub> in the CO<sub>2</sub>-CH<sub>4</sub> mixture at different stages of AL. a) Trained only on the initial dataset, b) Initial dataset + 1 point, c) Initial + 5 points, d) Initial + 10 points. We observe that as more points are provided to the GPs, both the GP's perceived error and the relative error starts to look similar. The AL only up to 10 points is shown. For the case of CO<sub>2</sub>-CH<sub>4</sub>, the AL goes to add 21 extra point besides the initial training set. Here only till 10 points of AL is shown to highlight the changes in the error as new points based on their uncertainty are provided to the GP.

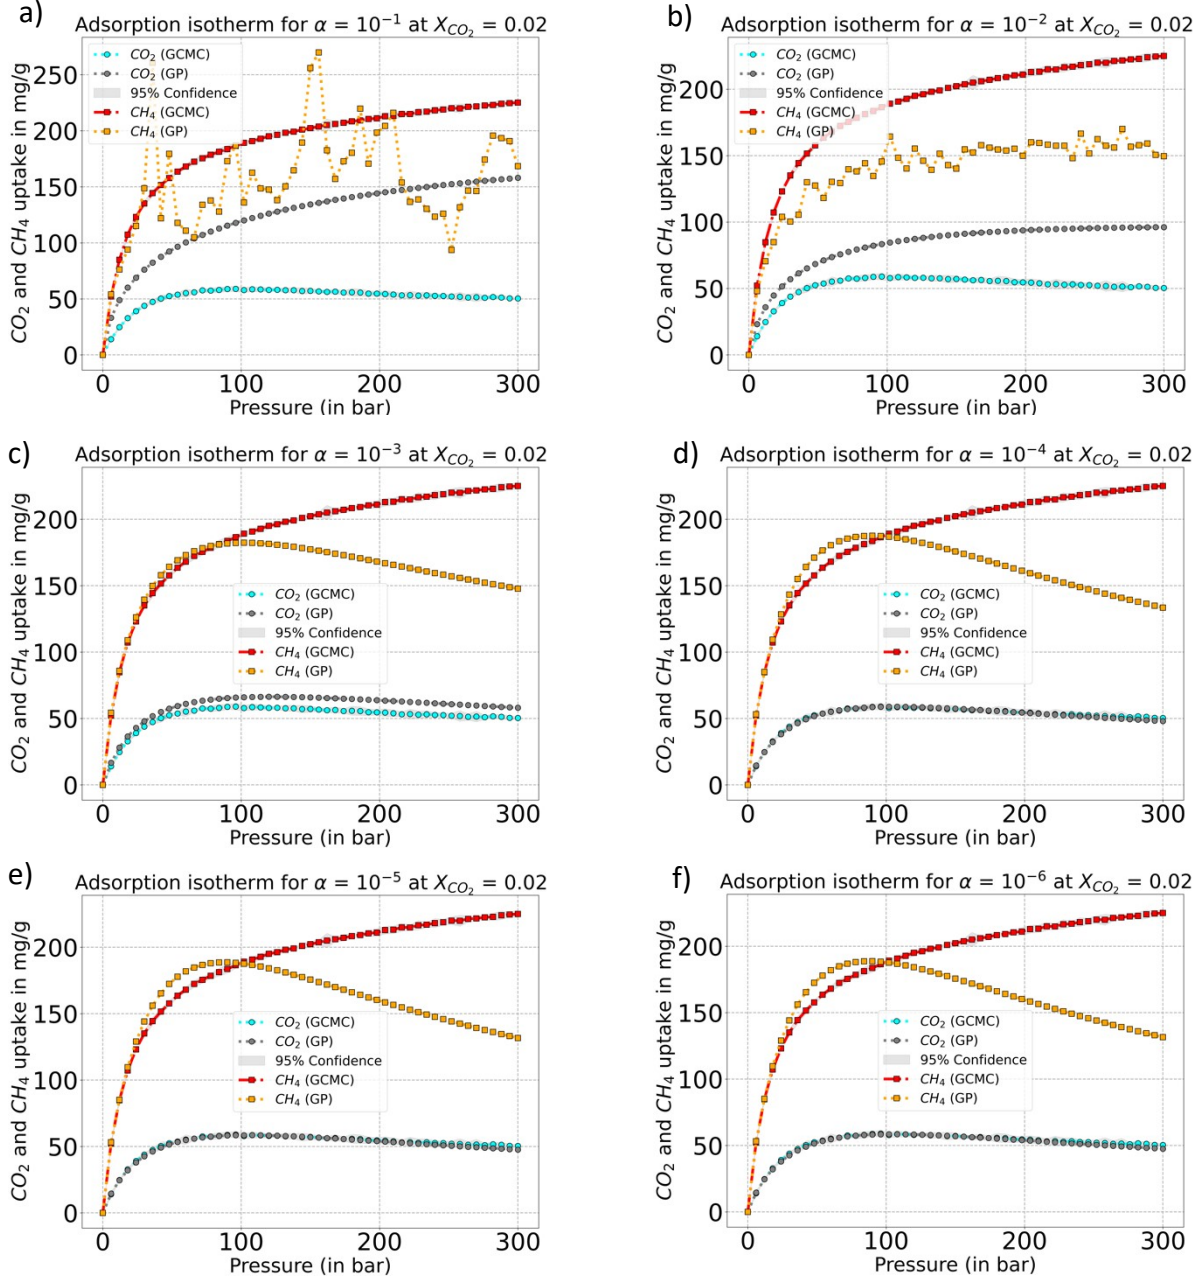

Figure S3. Comparing the adsorption isotherm plots for  $CO_2$ – $CH_4$  mixtures at  $X_{CO_2} = 0.02$  at 300K for different regularization parameter  $\alpha$  (for a single RQ kernel). The plot consists of  $\alpha$  of a)  $10^{-1}$ , b)  $10^{-2}$ , c)  $10^{-3}$ , d)  $10^{-4}$ , e)  $10^{-5}$ , and f)  $10^{-6}$ . The goal was to avoid high-fluctuation which can results from a high  $\alpha$ , which can provide a high-threshold for variance. We observe that fluctuations cease to exist at  $\alpha$  of  $10^{-3}$ . The next consideration was a balanced fit between the GP and the GCMC adsorption data. We find at  $\alpha$  of  $10^{-4}$  gives a better fit for both  $CO_2$  and  $CH_4$ . Hence, we keep the value for this gas mixture for both the P–X and P–X–T phase space active learning.

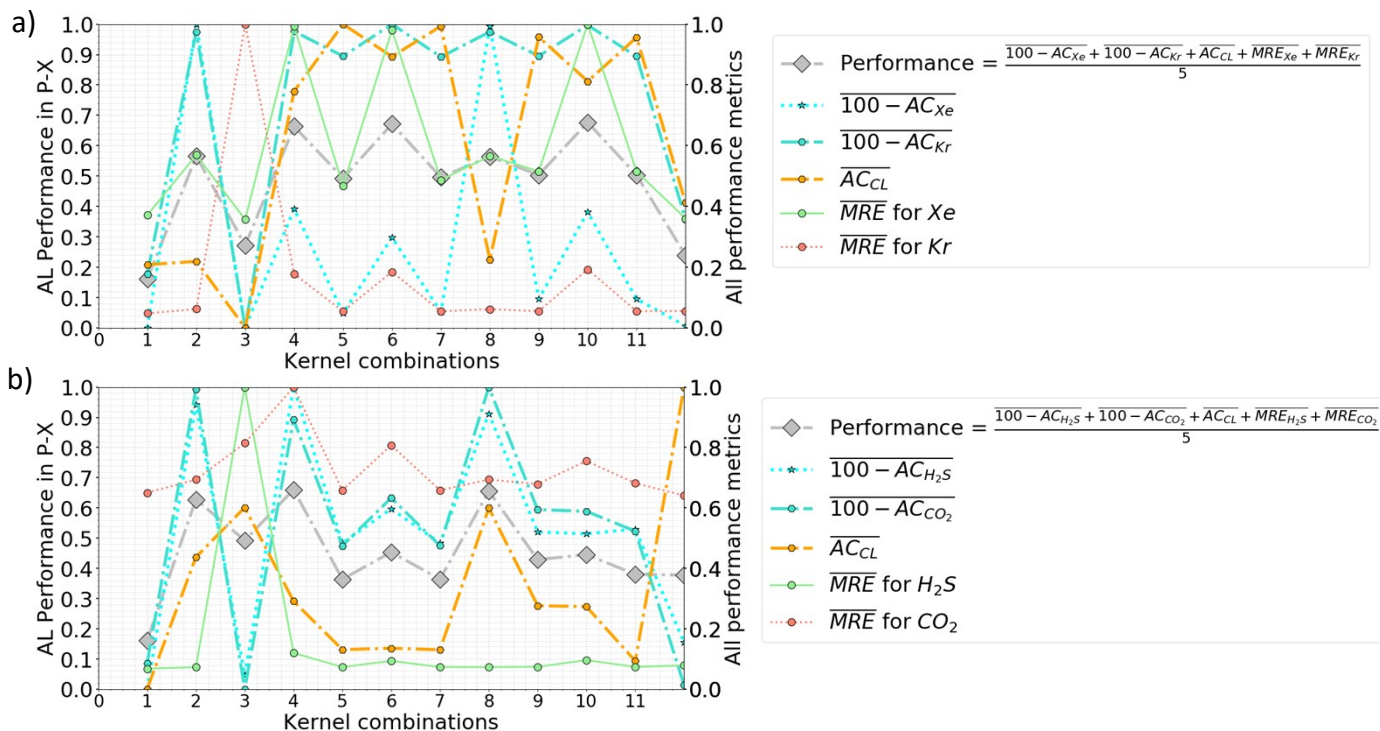

Figure S4. Kernel optimization results after 500 iterations of Active learning in the P–X phase space for a) Xe–Kr and b) H<sub>2</sub>S–CO<sub>2</sub>. The performance parameter in left side y-axis is a lumped parameter for five variables which are listed in the legends. From both a) and b), we observe that the index 1 is performing the best for both these systems. In figure 2, we also observe similar outcome for CO<sub>2</sub>–CH<sub>4</sub>. Thus, Rational Quadratic (RQ) performs best for all the three systems.

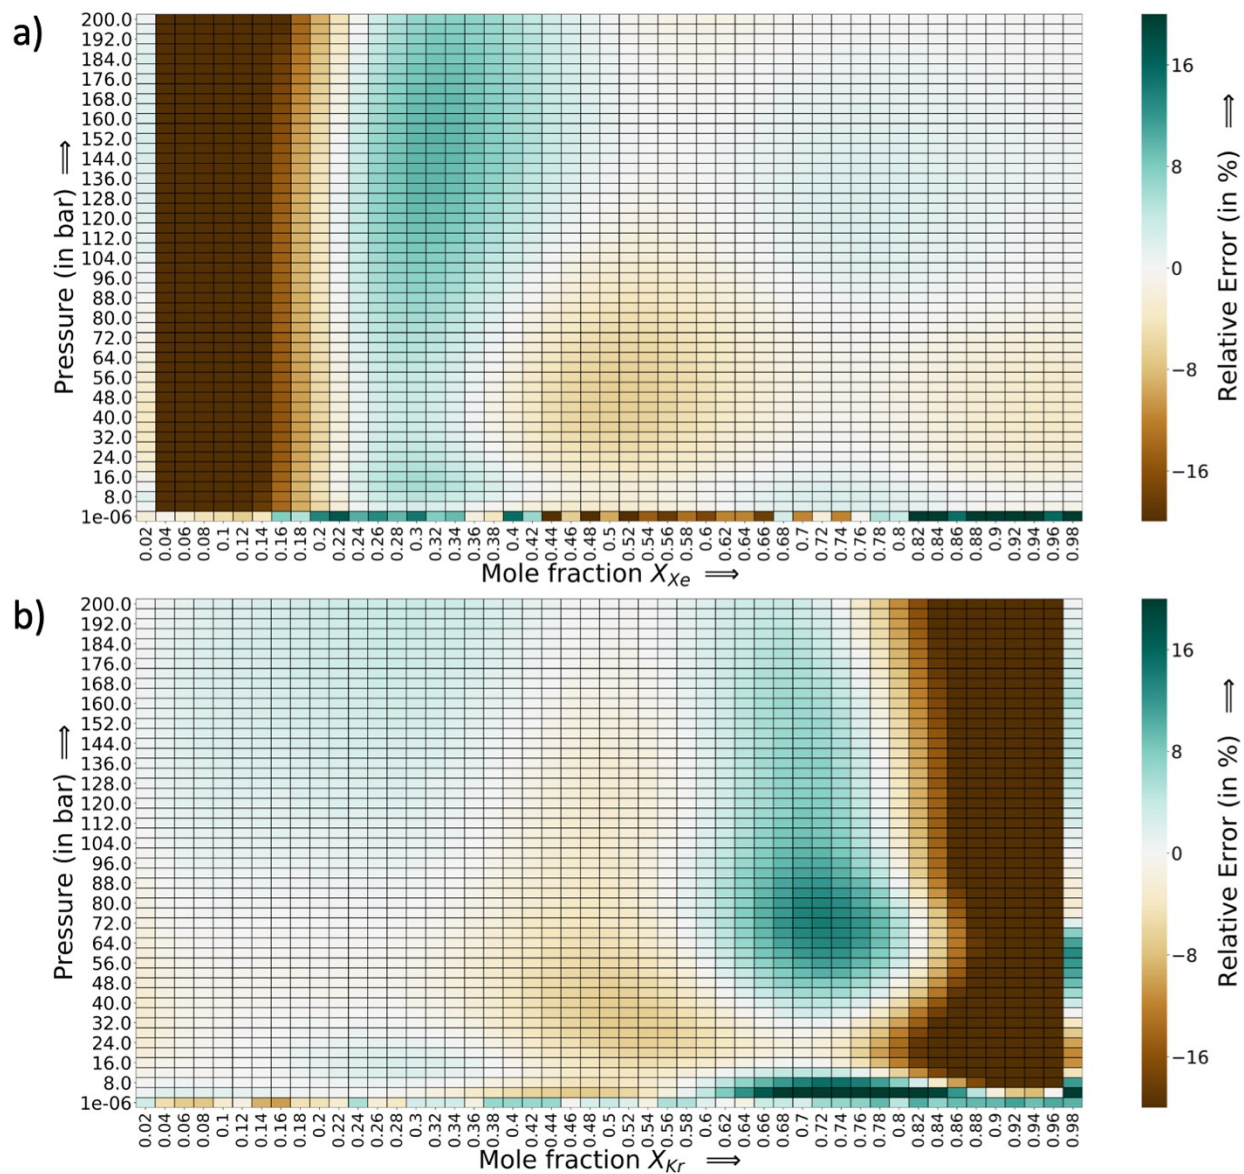

Figure S5. Error heat map for Xe–Kr system at the 90% PAC cut-off for a) Xe, and b) Kr. We find the densest region of high errors lies at low Xe-high Kr range. This again corresponded to the component that is more attractive to the Cu-BTC. Also, the errors are more under-prediction, only a small section corresponds to over-prediction.



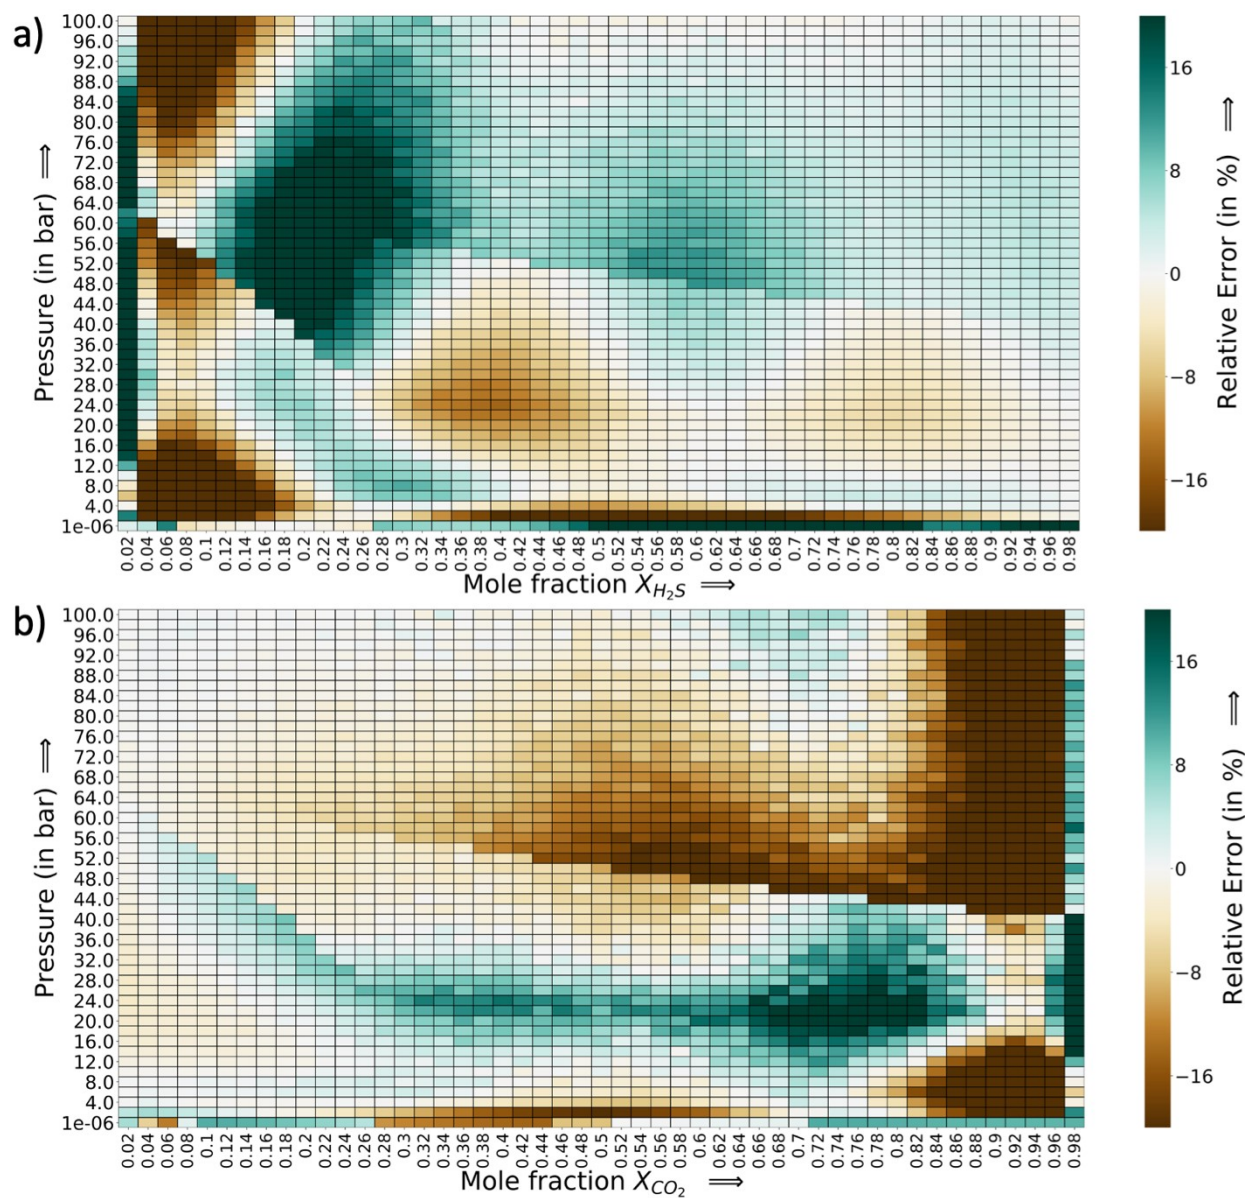

Figure S6. Error heat map for H<sub>2</sub>S–CO<sub>2</sub> system at the 90% PAC cut-off for a) H<sub>2</sub>S, and b) CO<sub>2</sub>. We find the densest region of high errors lies at low H<sub>2</sub>S-high CO<sub>2</sub> range.

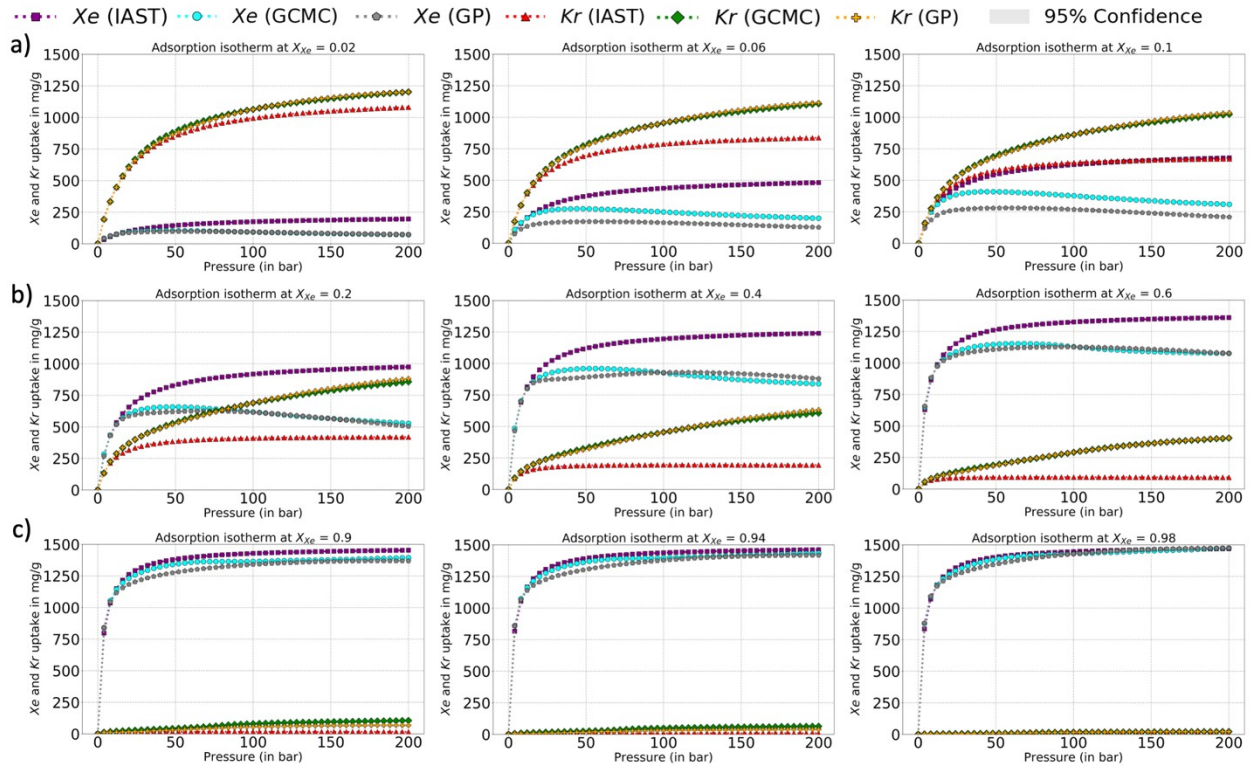

Figure S7. Adsorption plots for Xe–Kr system (RQ kernel, Index 1 of figure S2a) for the P-X phase space. a)  $X_{Xe} = 0.02, 0.06$  and  $0.10$ , b)  $X_{Xe} = 0.20, 0.40$  and  $0.60$ , and c)  $X_{Xe} = 0.90, 0.94$  and  $0.98$ . The highest deviation of the GP-predicted adsorption is seen for Xe at the low concentration of  $X_{Xe}$ . The GP-predicted adsorption matches well with GCMC beyond this range. Also, GP-model accurately captures Kr uptake for nearly all the pressure and temperature range.

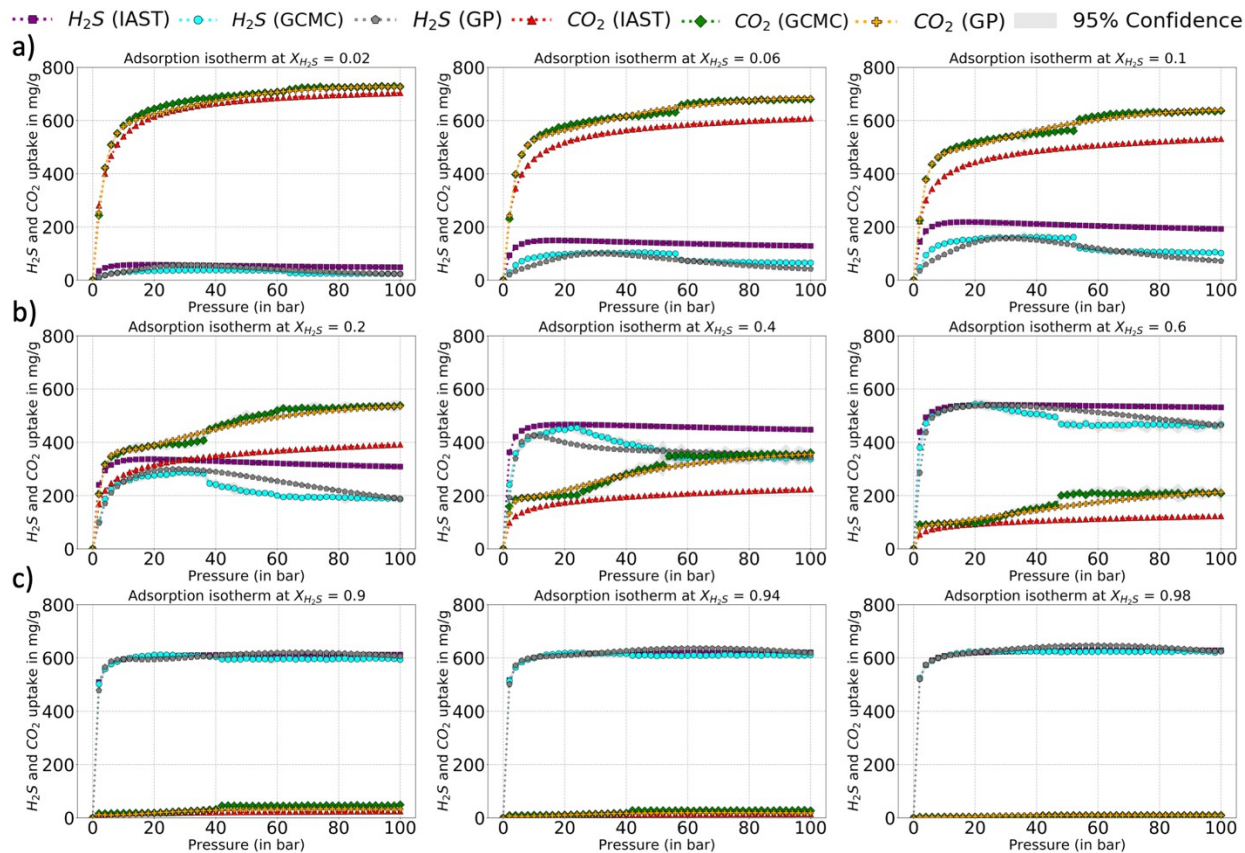

Figure S8. Adsorption plots for  $\text{H}_2\text{S}$ – $\text{CO}_2$  system (RQ kernel, Index 1 of figure S2b) for the P-X phase space. a)  $X_{\text{H}_2\text{S}} = 0.02, 0.06$  and  $0.10$ , b)  $X_{\text{H}_2\text{S}} = 0.20, 0.40$  and  $0.60$ , and c)  $X_{\text{H}_2\text{S}} = 0.90, 0.94$  and  $0.98$ . The highest deviation of the GP-predicted adsorption is seen for  $\text{H}_2\text{S}$  at medium concentration of  $X_{\text{H}_2\text{S}}$ . The GP-predicted adsorption matches well with GCMC at low and high values of  $X_{\text{H}_2\text{S}}$ . Also, GP-model accurately captures  $\text{CO}_2$  uptake on the low and high concentration of  $X_{\text{H}_2\text{S}}$ . However, the errors are higher for  $\text{CO}_2$  in medium concentration of  $X_{\text{H}_2\text{S}}$ , though less compared to that of  $\text{H}_2\text{S}$ .

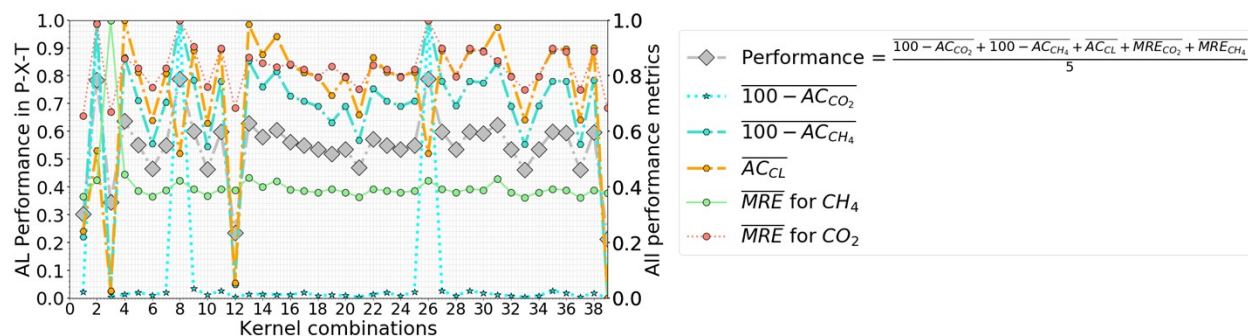

Figure S9. Performance plots for kernel optimization for CO<sub>2</sub>-CH<sub>4</sub> mixture after 500 iterations of active learning for P-X-T feature space. Here again there are 39 candidate kernel combinations. Like P-X feature, indices 1, 2 and 3 are: rational quadratic (RQ), Matérn (M), and radial basis function (RBF), and the rest of the combinations follows adding the kernels in that sequence only. Here, we find the best kernel to be index 39, which is RBF + RBF + RBF, followed very closely by kernel 12 which is dual RBF, followed by index 1 (RQ), and then index 3 (RBF). With these observations, RBF kernels for the GP provides a good fit for the CO<sub>2</sub>-CH<sub>4</sub> mixture.

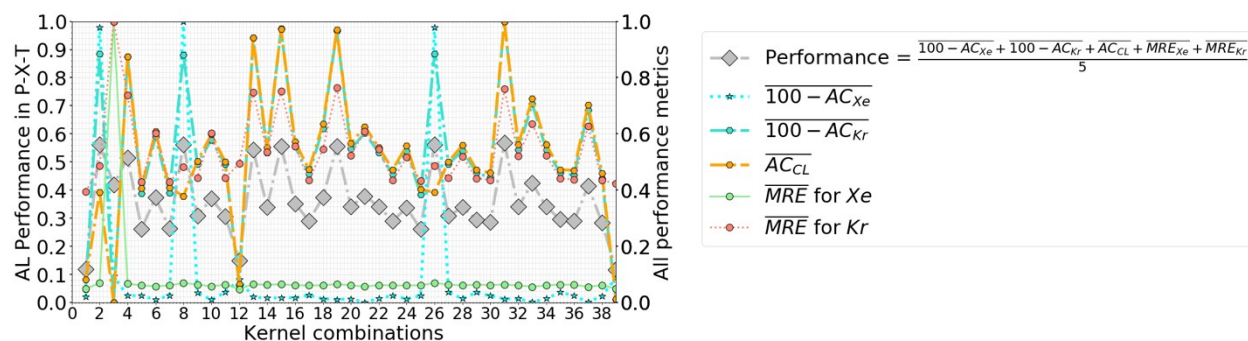

Figure S10. Performance plots for kernel optimization for Xe-Kr mixture after 500 iterations of active learning for P-X-T phase space. The best fit here corresponds to index 39 (triple RBF with performance: 0.1158), followed very closely by index 1 (RQ with performance: 0.1179).

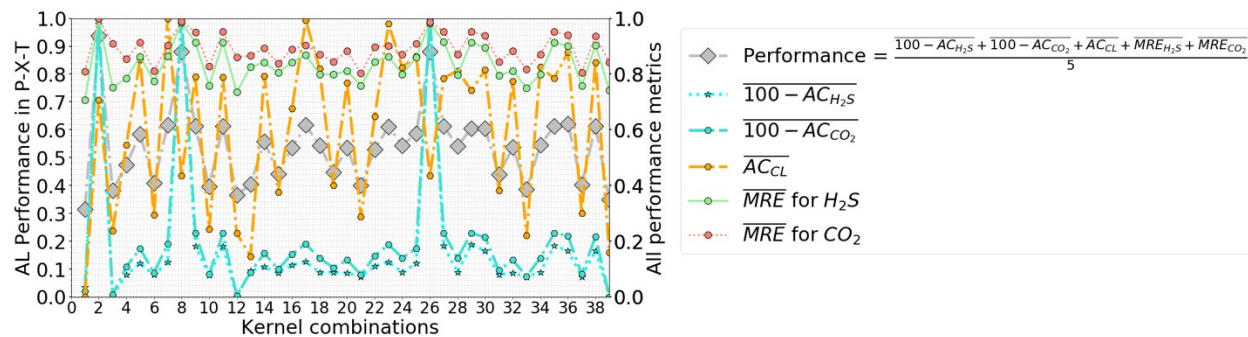

Figure S11. Performance plots for kernel optimization for H<sub>2</sub>S-CO<sub>2</sub> mixture after 500 iterations of active learning for P-X-T phase space. The best fit here corresponds to index 1 (RQ), followed by index 39 (triple RBF).

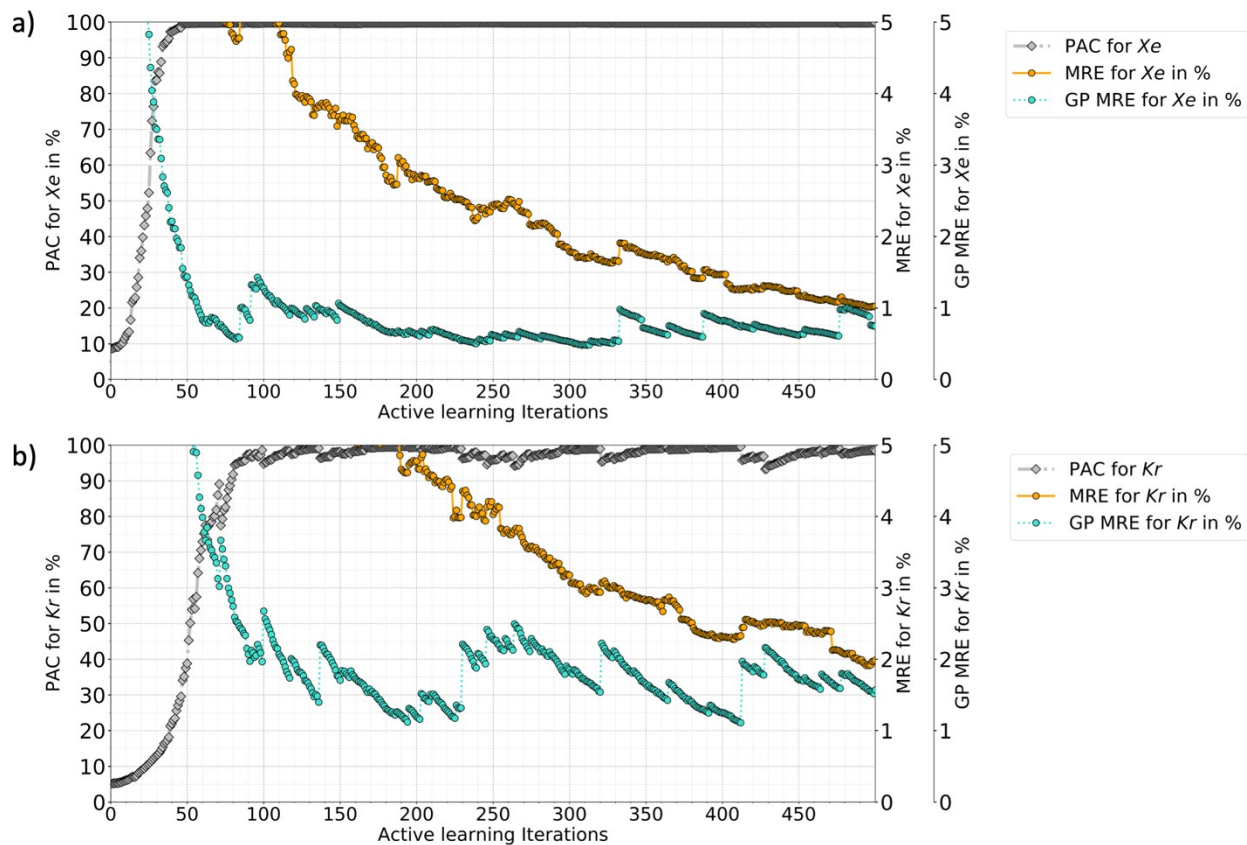

Figure S12. Active learning progression plots for a single RBF + RBF + RBF kernel for P-X-T phase space a) Xe, and b) Kr. As we see with subsequent iterations of the learning, the MRE (true error with respect to the ground truth) converges with the GP MRE. However, as we had set the accuracy threshold of 90%, the AL process will finish much earlier for a desired performance. This is just to show if the AL was to progress how the performance would be in the following iterations.

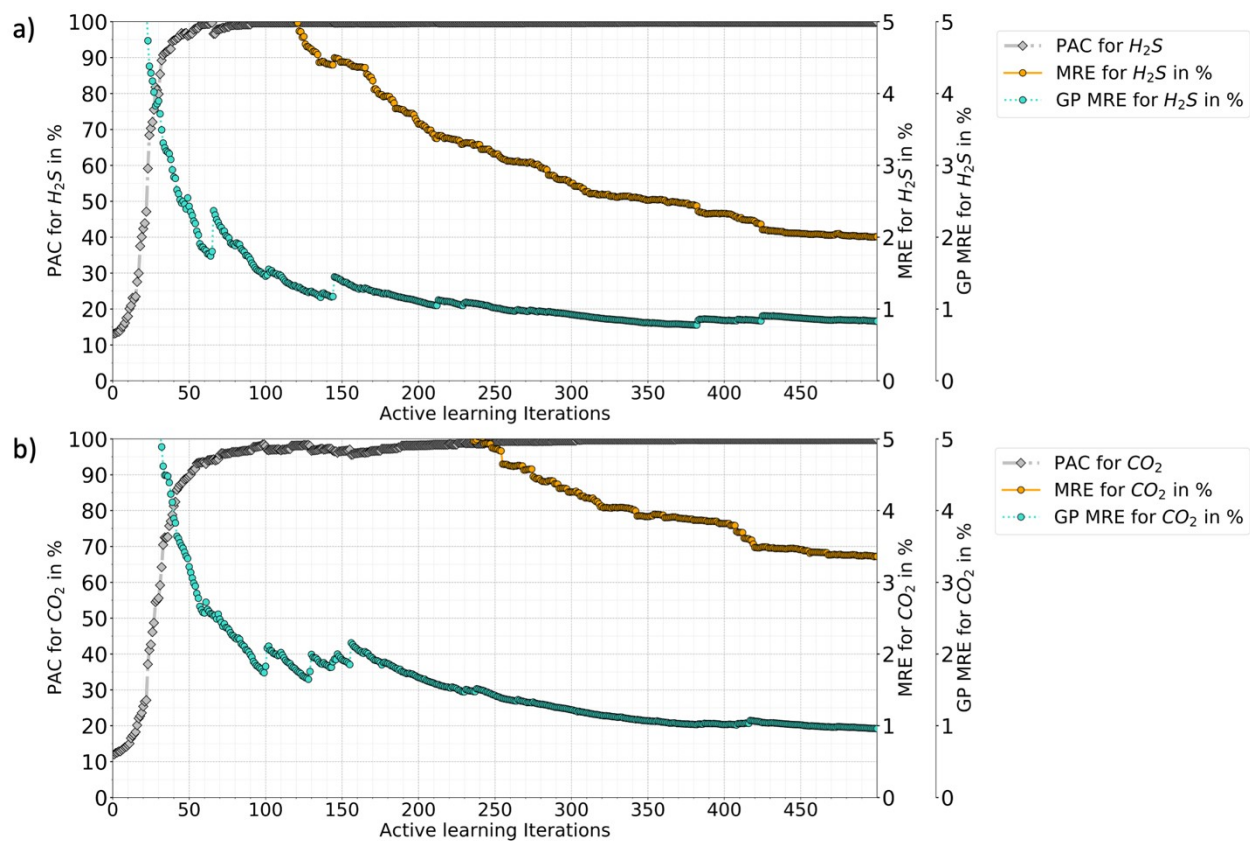

Figure S13. Active learning progression plots for a single RQ kernel for P-X-T phase space a) H<sub>2</sub>S, and b) CO<sub>2</sub>.

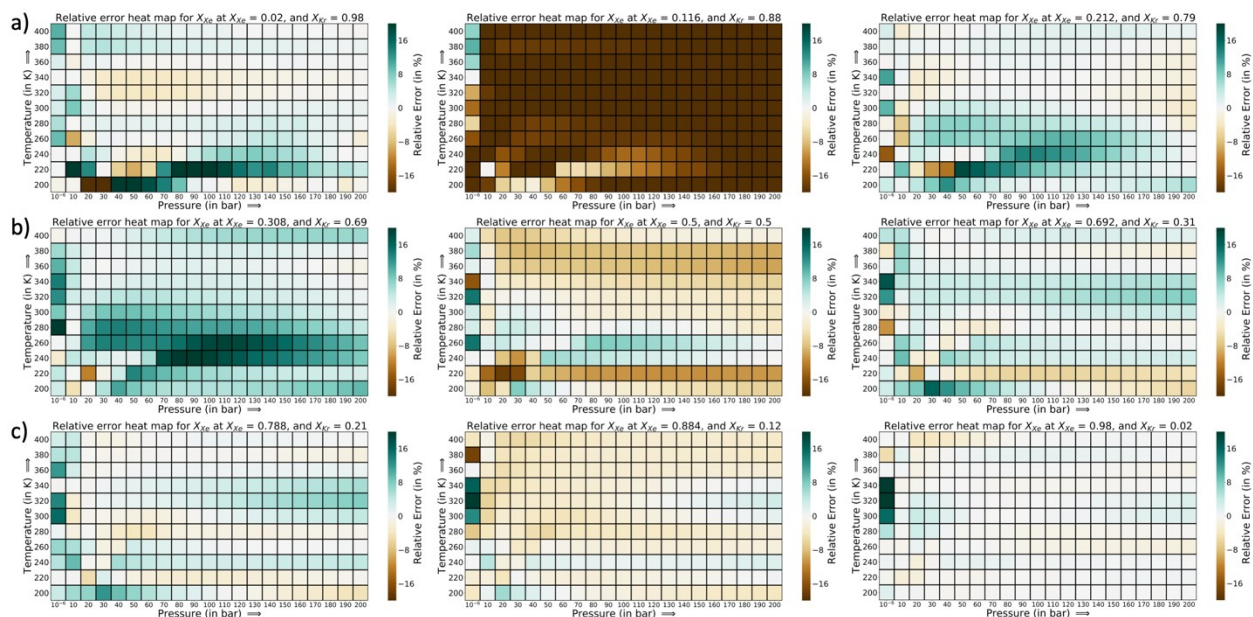

Figure S14. Relative error heat maps at the 90% PAC cut-off for Xe in the Xe-Kr mixture with triple-RBF kernel, a)  $X_{Xe} = 0.02, 0.116, \text{ and } 0.212$ , b)  $X_{Xe} = 0.308, 0.5, \text{ and } 0.692$ , and c)  $X_{Xe} = 0.788, 0.884, \text{ and } 0.98$ . We find the region of  $X_{Xe} = 0.116$  ( $X_{Kr} = 0.884$ ) having the highest errors for Xe uptake, with most errors showing that GP model in under-predicting. After this region, the error regions become less dense, with slight over-prediction by the GP for Xe compared to GCMC.

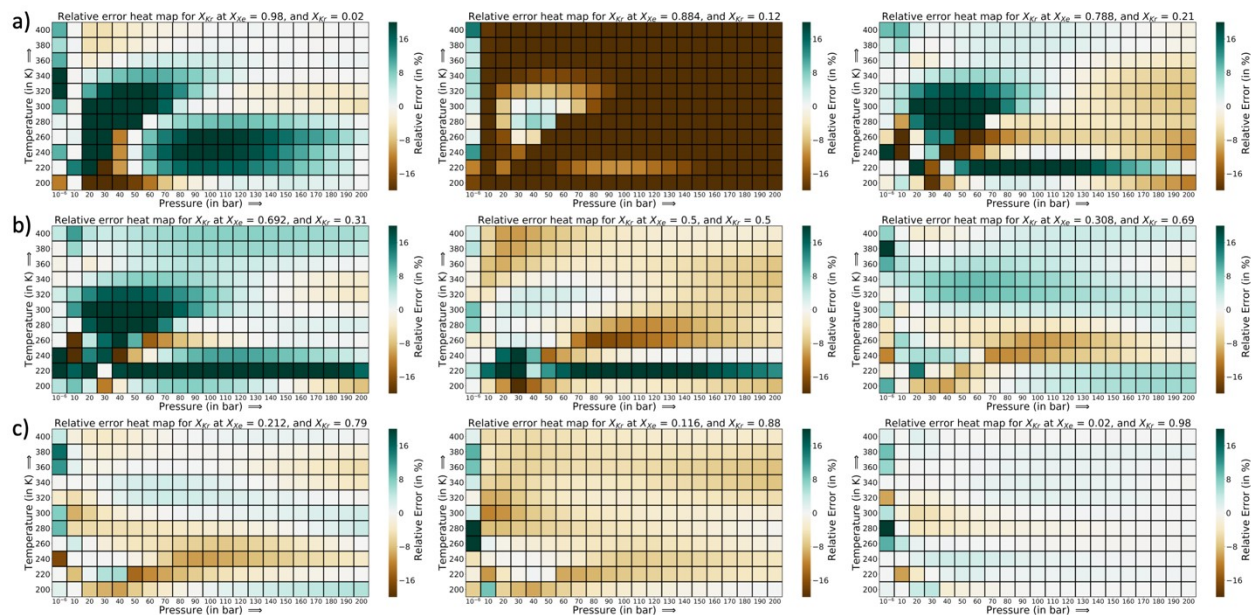

Figure S15. Relative error heat maps at the 90% PAC cut-off for Kr in the Xe-Kr mixture with triple-RBF kernel, a)  $X_{Kr} = 0.02, 0.116, \text{ and } 0.212$ , b)  $X_{Kr} = 0.308, 0.5, \text{ and } 0.692$ , and c)  $X_{Kr} = 0.788, 0.884, \text{ and } 0.98$ . We find the region of  $X_{Kr} = 0.116$  ( $X_{Xe} = 0.884$ ) having the highest errors for Kr uptake.

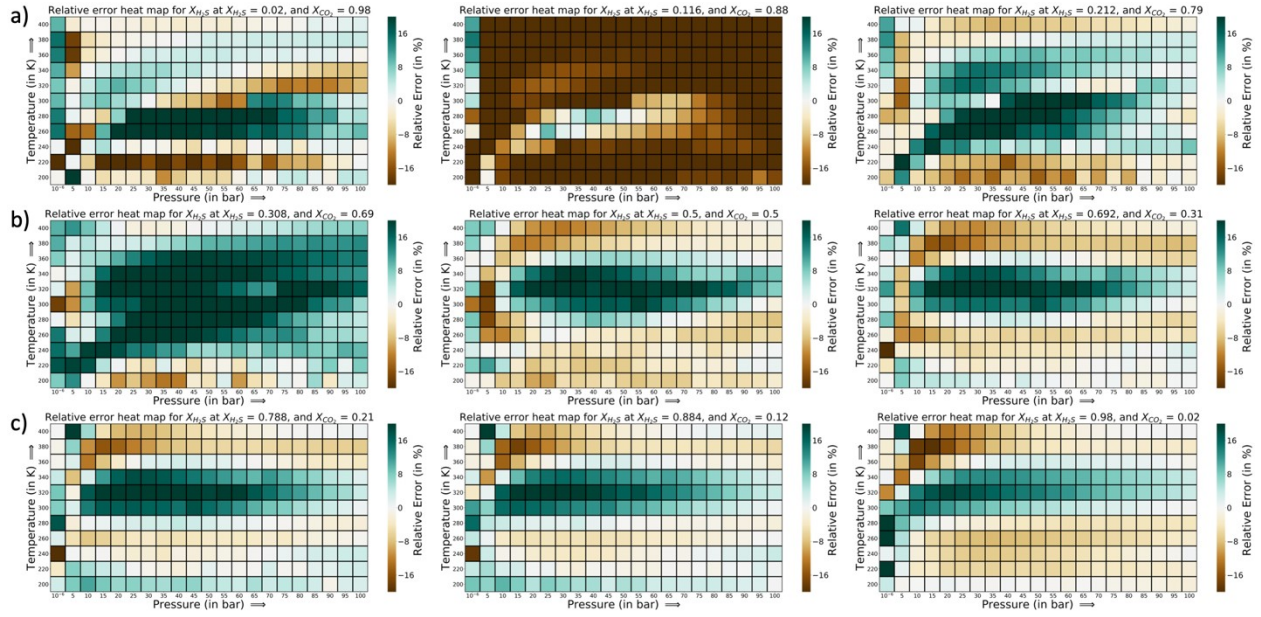

Figure S16. Relative error heat maps at the 90% PAC cut-off for  $H_2S$  in the  $H_2S-CO_2$  mixture with triple-RBF kernel, a)  $X_{H_2S} = 0.02, 0.116, \text{ and } 0.212$ , b)  $X_{H_2S} = 0.308, 0.5, \text{ and } 0.692$ , and c)  $X_{H_2S} = 0.788, 0.884, \text{ and } 0.98$ .

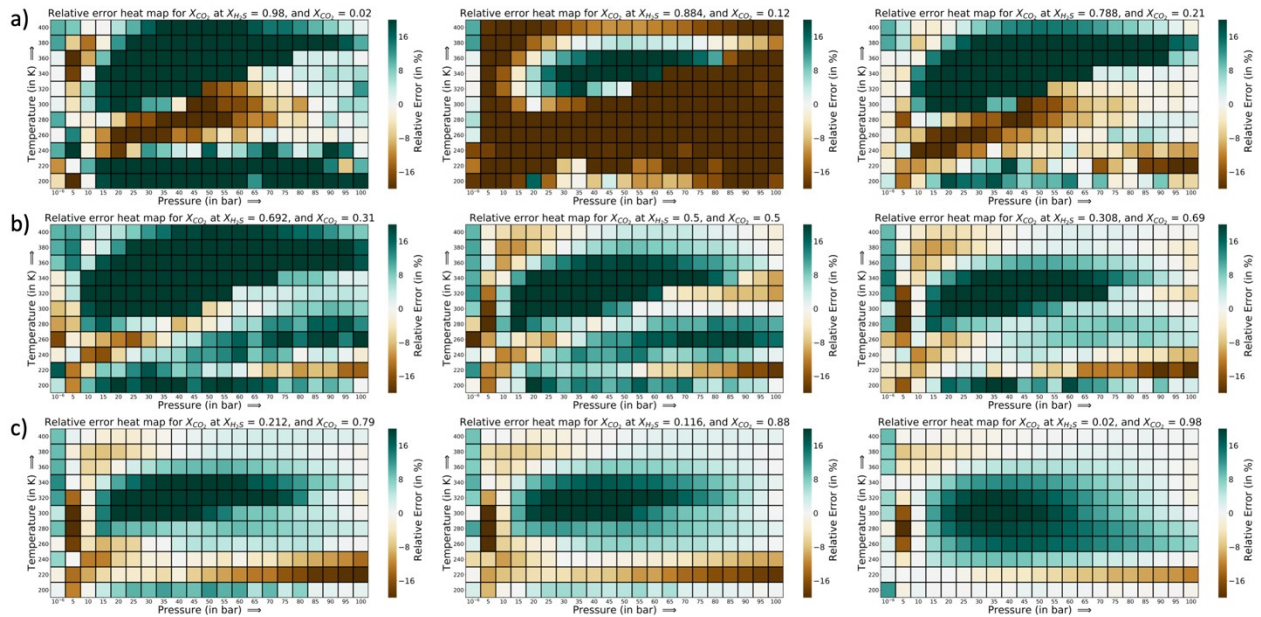

Figure S17. Relative error heat maps at the 90% PAC cut-off for  $CO_2$  in the  $H_2S-CO_2$  mixture with triple-RBF kernel, a)  $X_{CO_2} = 0.02, 0.116, \text{ and } 0.212$ , b)  $X_{CO_2} = 0.308, 0.5, \text{ and } 0.692$ , and c)  $X_{CO_2} = 0.788, 0.884, \text{ and } 0.98$ .



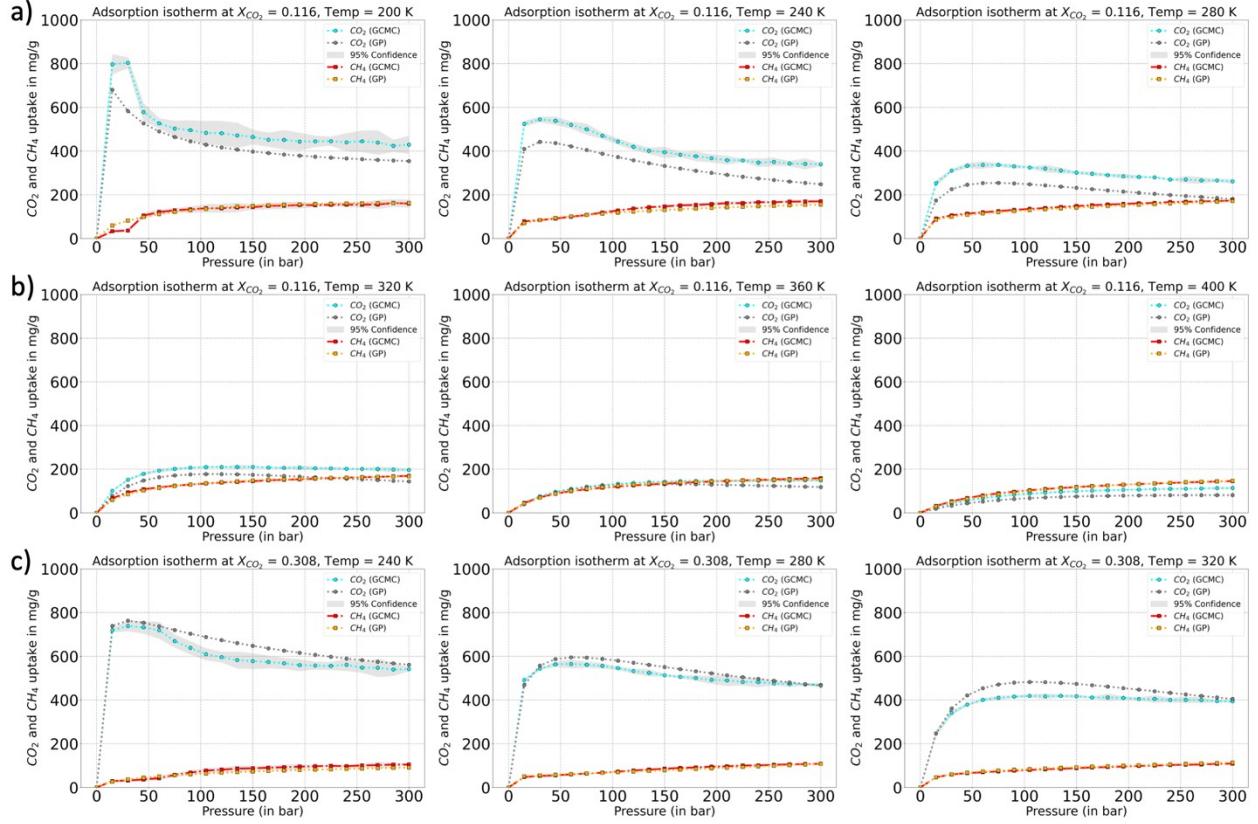

Figure S18. Adsorption isotherms at the 90% PAC cut-off for regions with highest relative errors for  $\text{CO}_2$  in  $\text{CO}_2$ - $\text{CH}_4$  mixture (triple-RBF kernels), a)  $X_{\text{CO}_2} = 0.116$  and  $T = 200, 240$  and  $280$  K, b)  $X_{\text{CO}_2} = 0.116$  and  $T = 320, 360$  and  $400$  K, and c)  $X_{\text{CO}_2} = 0.308, 240, 280,$  and  $320$  K. We find the region at  $X_{\text{CO}_2} = 0.116$  having the highest errors for  $\text{CO}_2$  uptake. The model is also under-predicting adsorption of  $\text{CO}_2$  at  $X_{\text{CO}_2} = 0.116$ , and then over-predicts from on  $X_{\text{CO}_2} = 0.308$ .

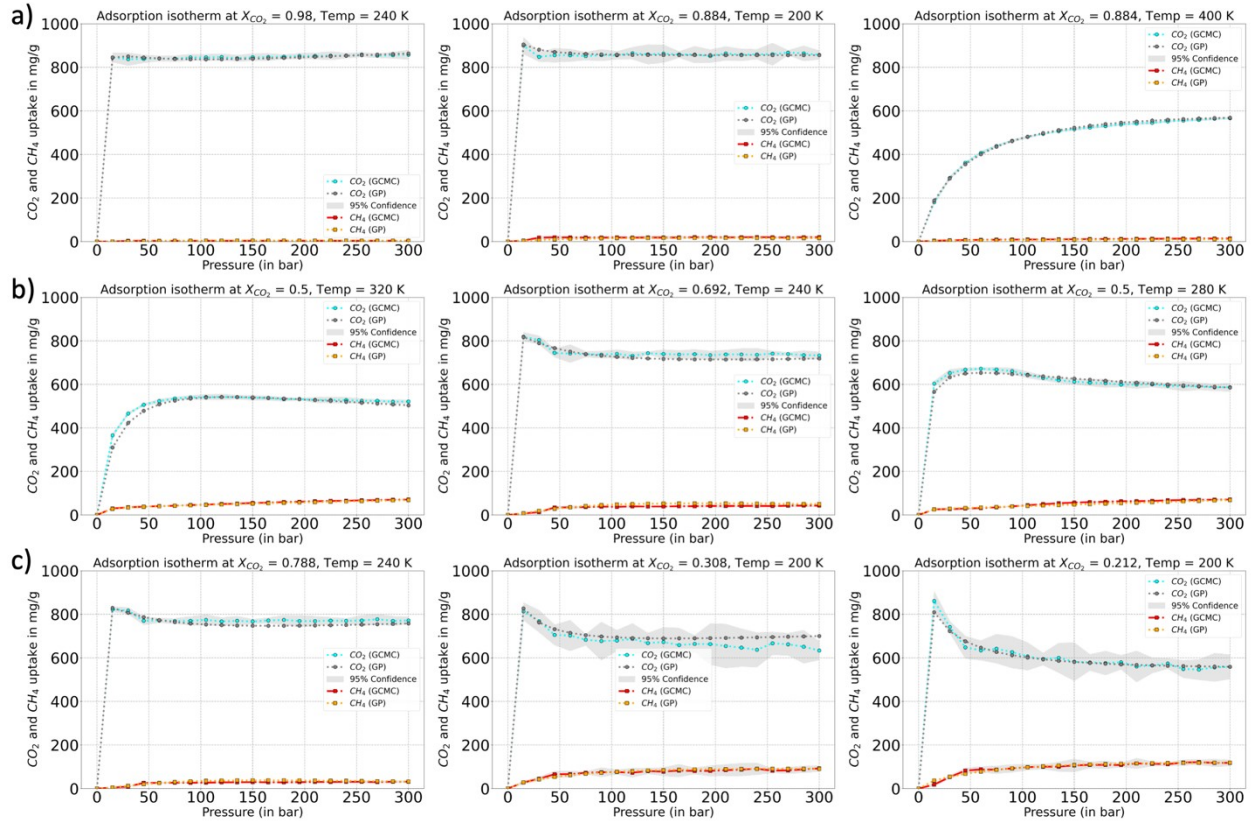

Figure S19. Adsorption isotherms at the 90% PAC cut-off for regions with highest relative errors for  $\text{CH}_4$  in the  $\text{CO}_2$ - $\text{CH}_4$  mixture, a)  $X_{\text{CH}_4} = 0.02$  ( $X_{\text{CO}_2} = 0.98$ )  $T = 240$  K,  $X_{\text{CH}_4} = 0.116$  and  $T = 200$  and  $400$  K, b)  $X_{\text{CH}_4} = 0.212$  and  $T = 240$  K,  $X_{\text{CH}_4} = 0.308$  and  $T = 240$  K,  $X_{\text{CH}_4} = 0.5$  and  $T = 280$  K, and c)  $X_{\text{CH}_4} = 0.5$  and  $T = 320$  K,  $X_{\text{CH}_4} = 0.692$  and  $T = 200$  K,  $X_{\text{CH}_4} = 0.788$  and  $T = 200$  K. The region with most errors for  $\text{CH}_4$  lies where adsorption is not very high. In fact, for a) it is evident that  $\text{CH}_4$  uptake is near 0. Hence, the MRE is high at these points. The GP fit, we observe, corresponds in the same trend as the GCMC for all these regions.

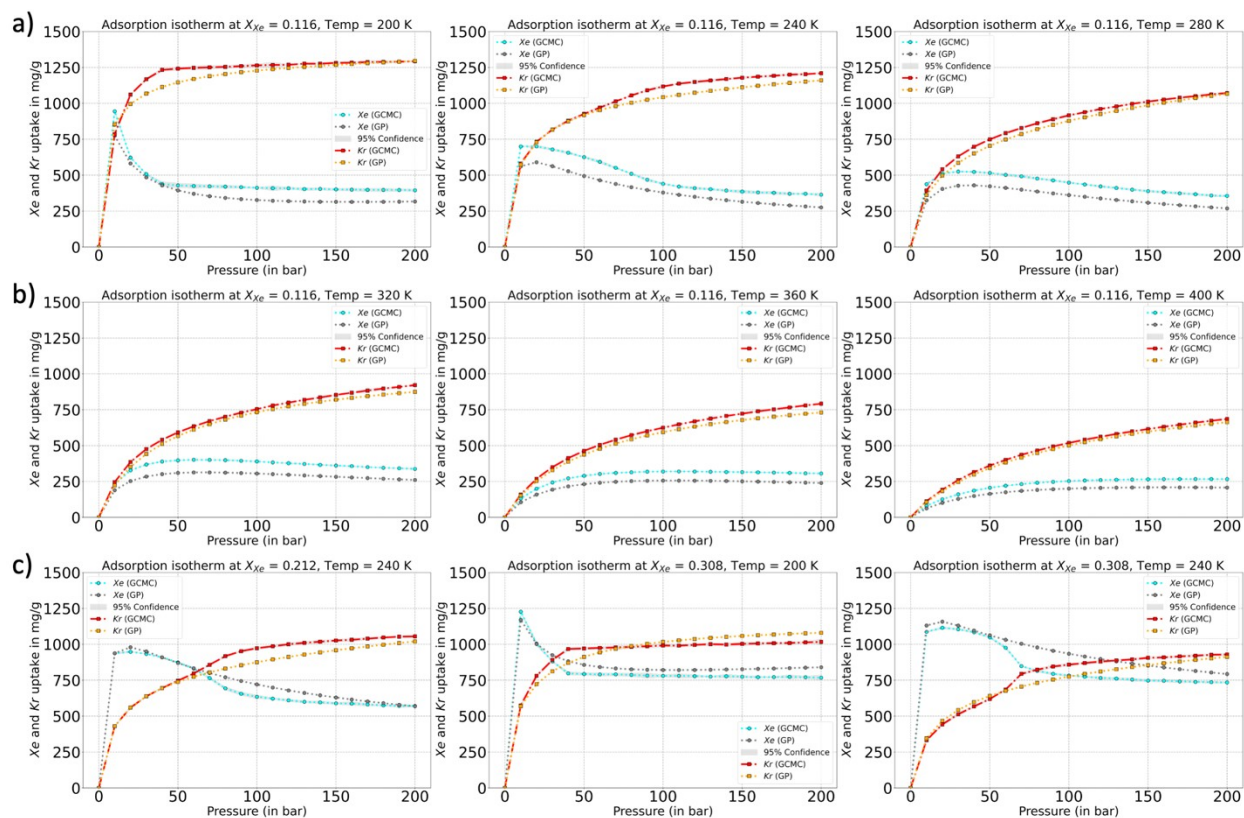

Figure S20. Adsorption isotherms at the 90% PAC cut-off for regions with highest relative errors for Xe in Xe-Kr mixture (triple-RBF kernels), a)  $X_{Xe} = 0.116$  and  $T = 200, 240$  and  $280$  K, b)  $X_{Xe} = 0.116$  and  $T = 320, 360$  and  $400$  K, and c)  $X_{Xe} = 0.212, 240$  K, and  $X_{Xe} = 0.308$  and  $T = 200$ , and  $240$  K. We find the region at  $X_{Xe} = 0.116$  having the highest errors for Xe uptake. The model is also under-predicting adsorption of Xe at  $X_{Xe} = 0.116$ , and then slightly over-predicts from on  $X_{Xe} = 0.212$  and  $0.308$ .

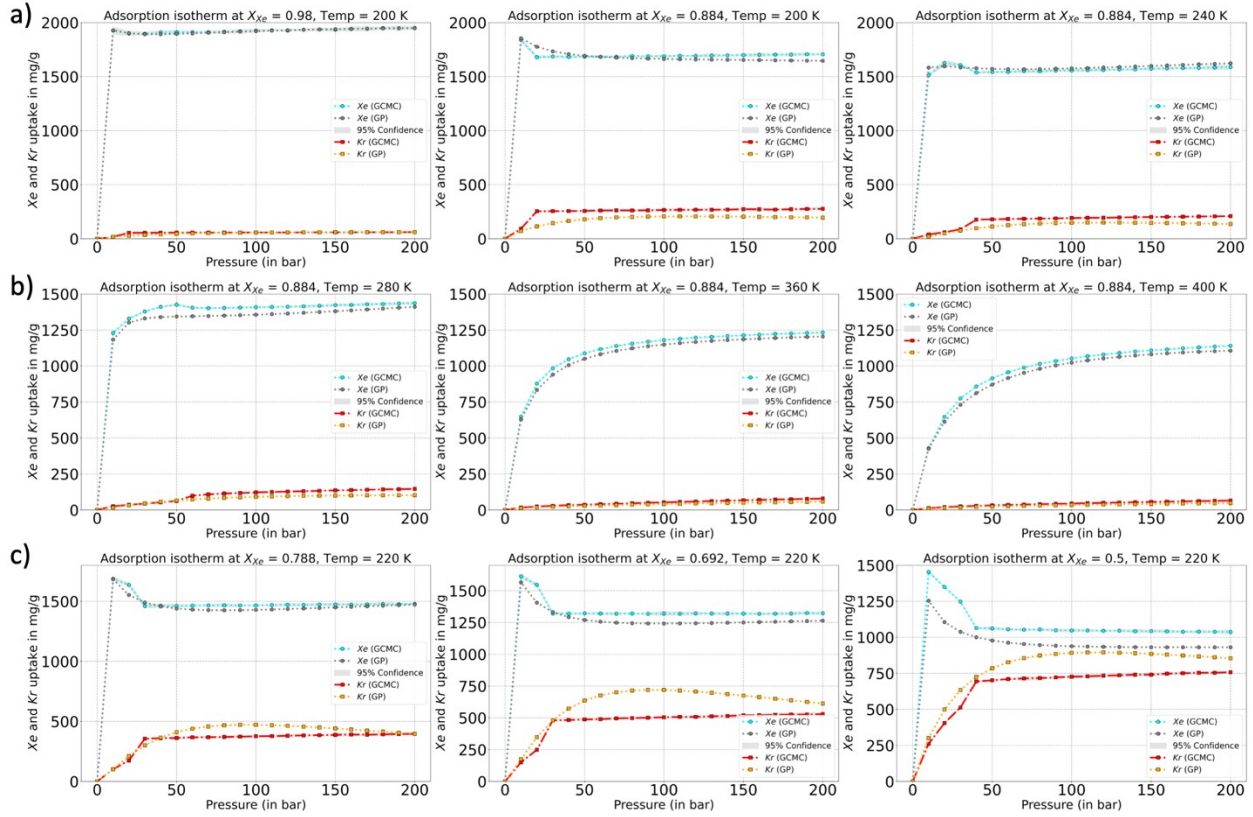

Figure S21. Adsorption isotherms at the 90% PAC cut-off for regions with highest relative errors for Kr in Xe-Kr mixture (triple-RBF kernels), a)  $X_{Kr} = 0.02$  ( $X_{Xe} = 0.98$ ),  $T = 200$  K, and  $X_{Kr} = 0.116$ , and  $T = 200$ , and  $280$  K, b)  $X_{Kr} = 0.116$  and  $T = 280, 360$  and  $400$  K, and c)  $X_{Kr} = 0.212, 0.308, 0.50$  at  $220$  K. We find the region at  $X_{Xe} = 0.116$  having the highest errors for Xe uptake. The model is also under-predicting adsorption of Xe at  $X_{Xe} = 0.116$ , and then slightly over-predicts from on  $X_{Xe} = 0.212$  and  $0.308$ .

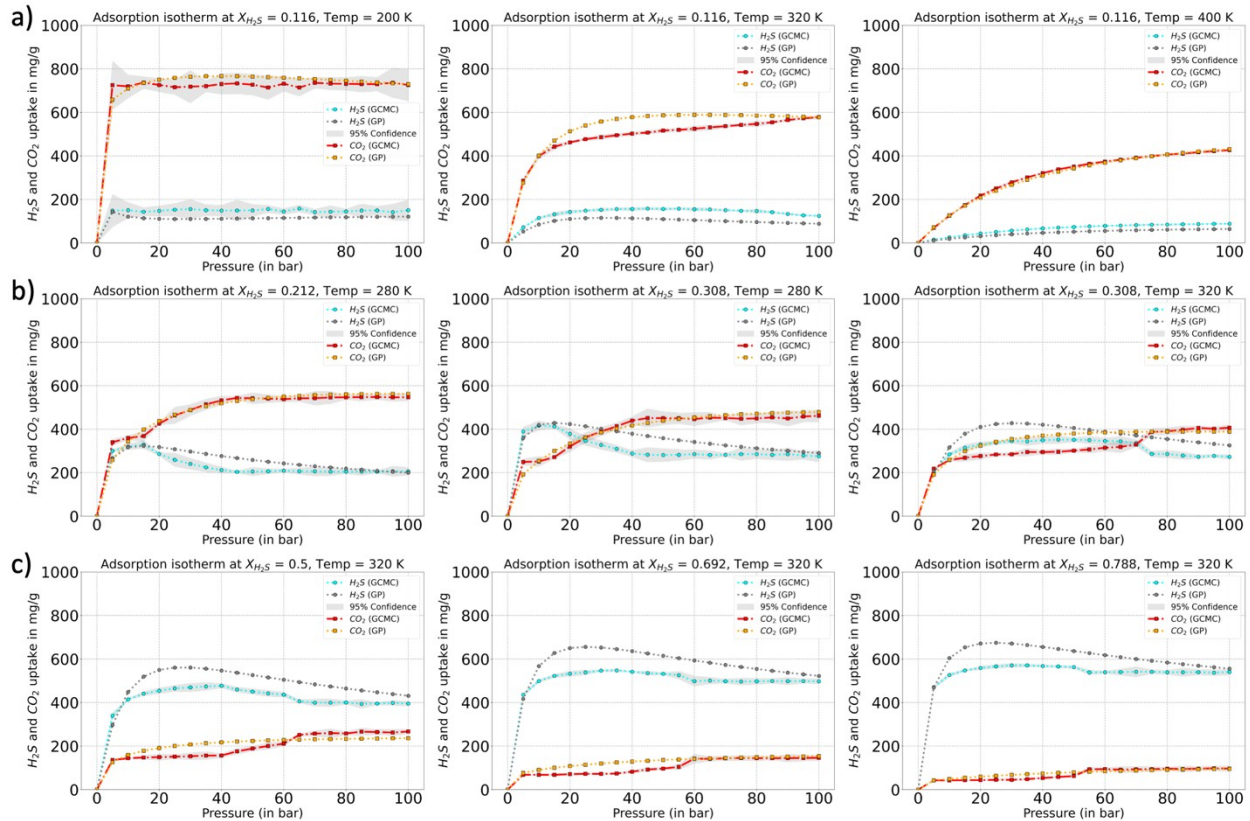

Figure S22. Adsorption isotherms at the 90% PAC cut-off for regions with highest relative errors for H<sub>2</sub>S in H<sub>2</sub>S-CO<sub>2</sub> mixture (RQ kernel), a)  $X_{H_2S} = 0.116$  and T = 200, 320 and 400 K, b)  $X_{H_2S} = 0.212$  and T = 280,  $X_{H_2S} = 0.308$ , T = 280 and 320 K, and c)  $X_{H_2S} = 0.5$ , and T = 320 K, and  $X_{H_2S} = 0.692$  and T = 320 K,  $X_{H_2S} = 0.788$ , and T = 320 K. One observation is this, since both H<sub>2</sub>S and CO<sub>2</sub> have strong interaction with the Cu-BTC MOF, the H<sub>2</sub>S doesn't necessarily replace CO<sub>2</sub> at low concentration of H<sub>2</sub>S compared to how fast CO<sub>2</sub> itself was able to replace CH<sub>4</sub> at low CO<sub>2</sub> concentrations. These means the sharp inverse adsorption trend that was observed for CO<sub>2</sub> in the CO<sub>2</sub>-CH<sub>4</sub> mixture at low CO<sub>2</sub> concentrations are not seen here initially at low H<sub>2</sub>S levels. But as the H<sub>2</sub>S concentration increases to level of 30% (mole fraction of 0.308), we start to see those inverse trends in adsorption. Therefore, the errors trends are also pushed back, much more uniformly, across different mole fraction range.

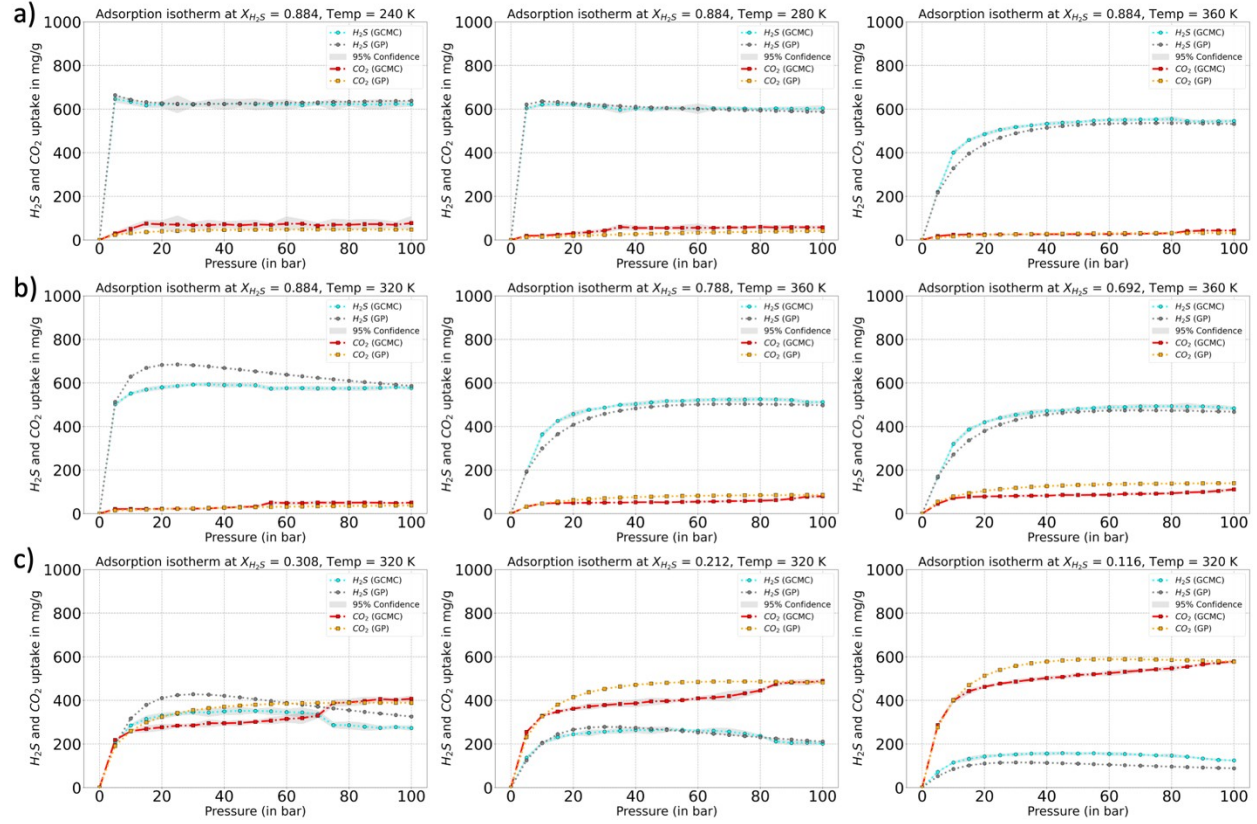

Figure S23. Adsorption isotherms at the 90% PAC cut-off for regions with highest relative errors for  $\text{CO}_2$  in  $\text{H}_2\text{S}$ - $\text{CO}_2$  mixture (RQ kernel) for the P-X-T phase space, a)  $X_{\text{CO}_2} = 0.116$  ( $X_{\text{H}_2\text{S}} = 1 - X_{\text{CO}_2} = 0.884$ ) and  $T = 240, 280$  and  $360$  K, b)  $X_{\text{CO}_2} = 0.116$  and  $T = 320$ ,  $X_{\text{CO}_2} = 0.212$ , and  $T = 360$  K,  $X_{\text{CO}_2} = 0.308$ , and  $T = 360$  K, and c)  $X_{\text{CO}_2} = 0.692$ , and  $T = 320$  K, and  $X_{\text{CO}_2} = 0.788$  and  $T = 320$  K,  $X_{\text{CO}_2} = 0.884$ , and  $T = 320$  K. We find the region at  $X_{\text{CO}_2} = 0.116$  having the same trend as GCMC but under-prediction at low temperatures ( $T = 240$  and  $280$  K). The error for  $\text{CO}_2$  beyond this mole-fraction value is always over-prediction but again the trend is being followed.

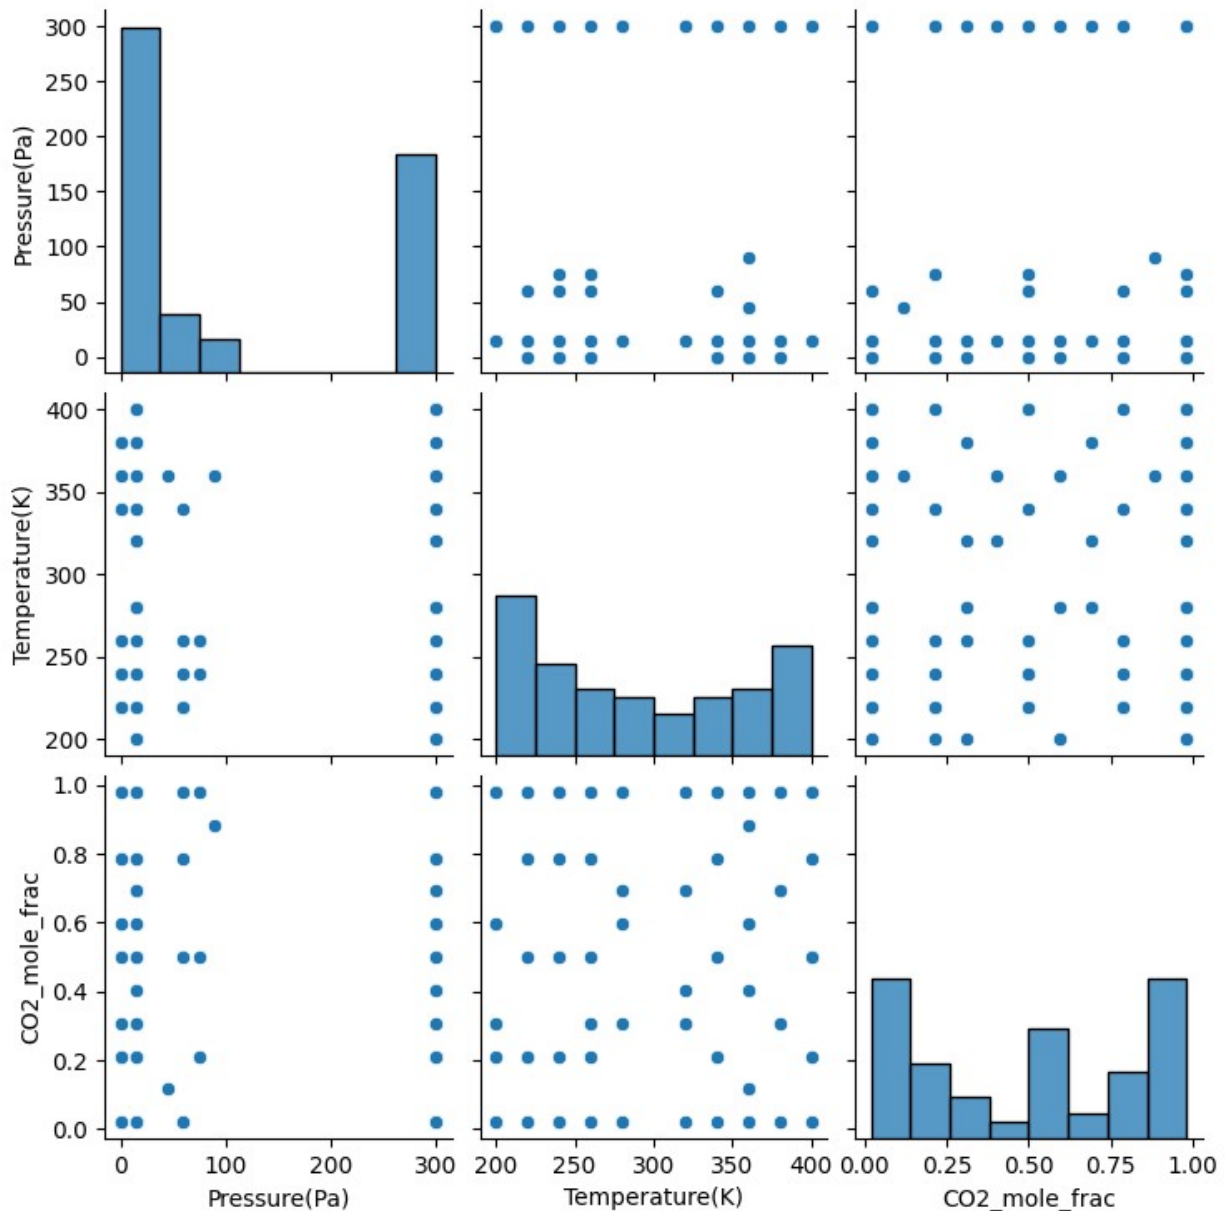

Figure S24. Correlation plots for CO<sub>2</sub>-CH<sub>4</sub> mixture representing all the points sampled in the P-X-T after the AL is complete after 90% PAC limit is met. We see for pressure most points are located at low and high point values, followed by a similar distribution in the mole-fraction features. Finally, temperature has the most distribution with respect to the points sampled.

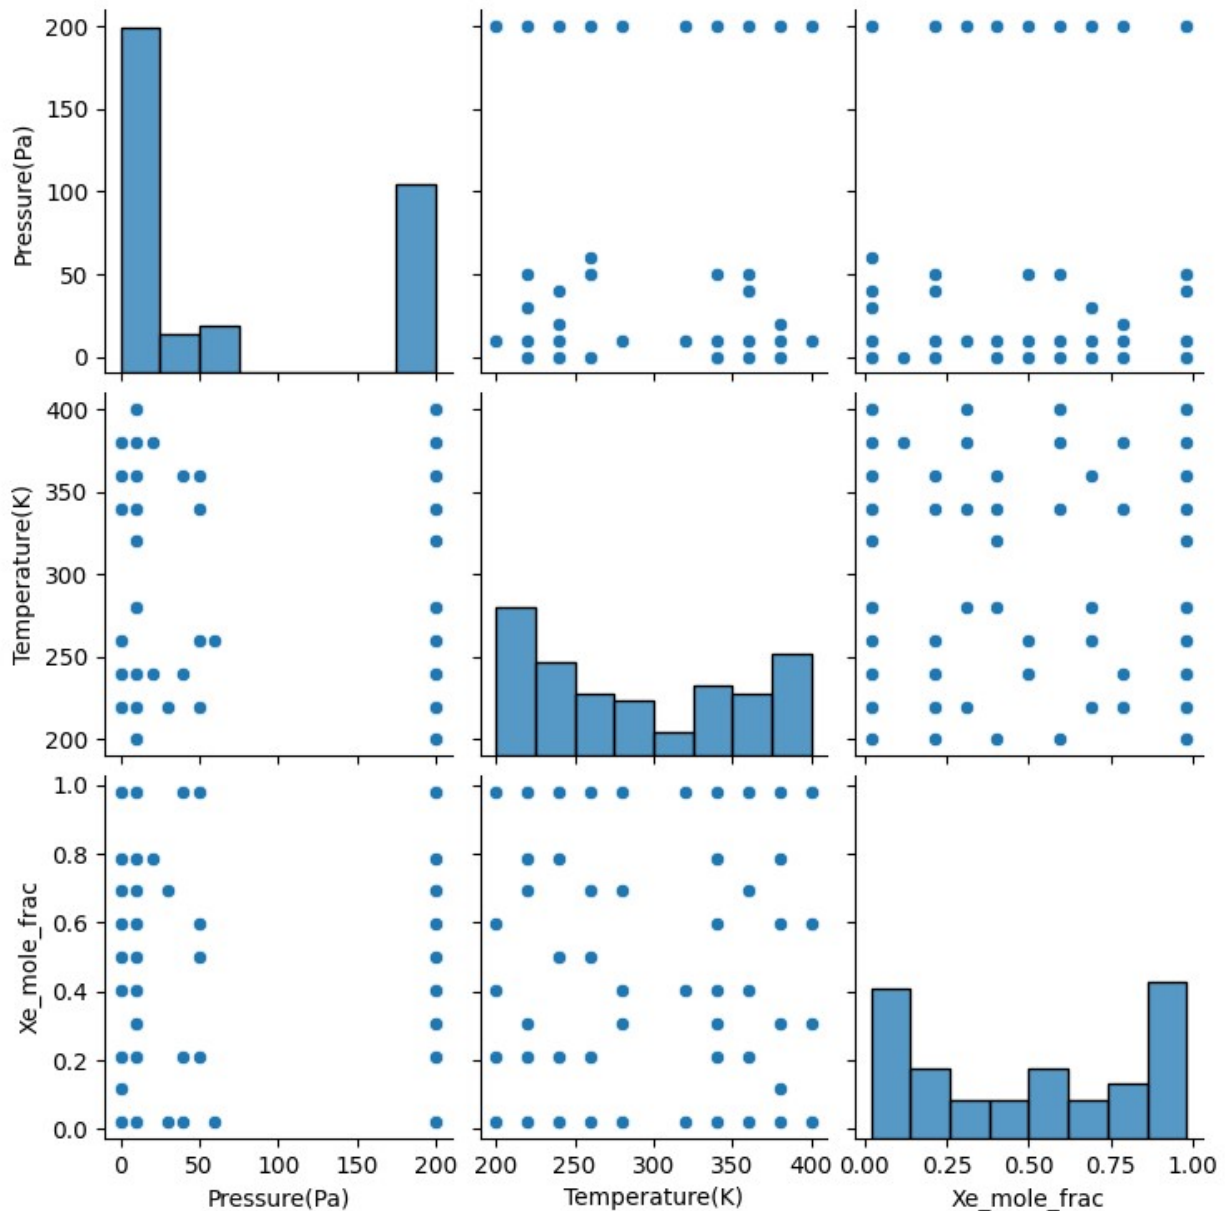

Figure S25. Correlation plots for Xe-Kr mixture representing all the points sampled in the P-X-T after the AL is complete after 90% PAC limit is met. We see for pressure most points are located at low and high point values, followed by a similar distribution in the mole-fraction features. Temperature again has the most distribution with respect to the points sampled.



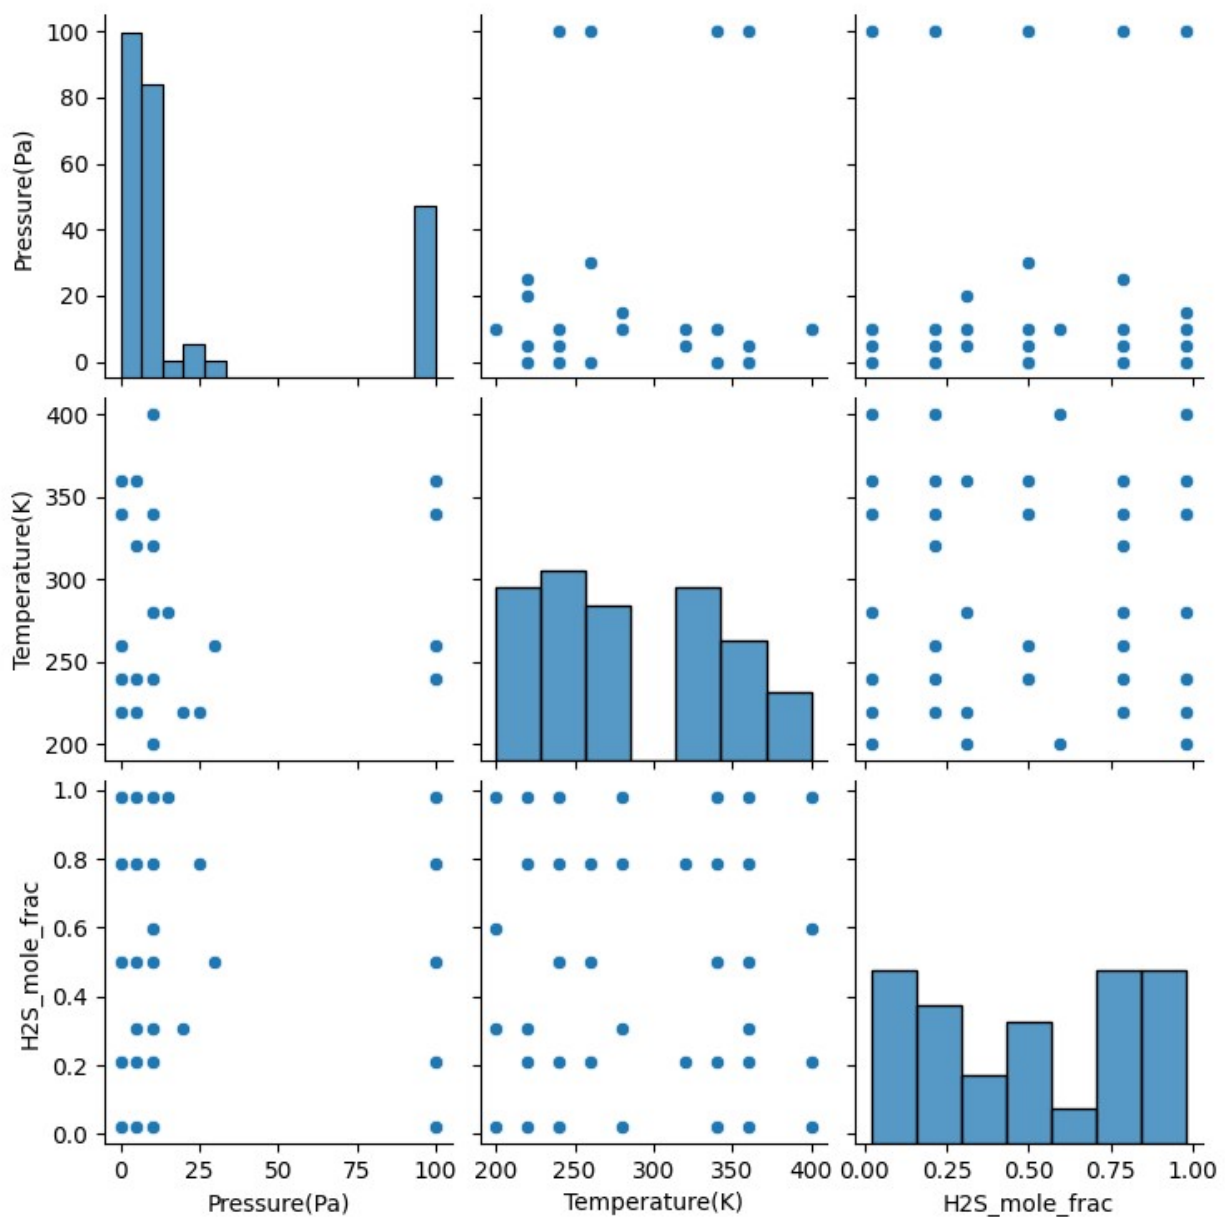

Figure S26. Correlation plots for H<sub>2</sub>S-CO<sub>2</sub> mixture representing all the points sampled in the P-X-T after the AL is complete after 90% PAC limit is met. We see for pressure most points are located at low and high point values, followed by a similar distribution in the mole-fraction features. Here as well, temperature has the most distribution with respect to the points sampled.

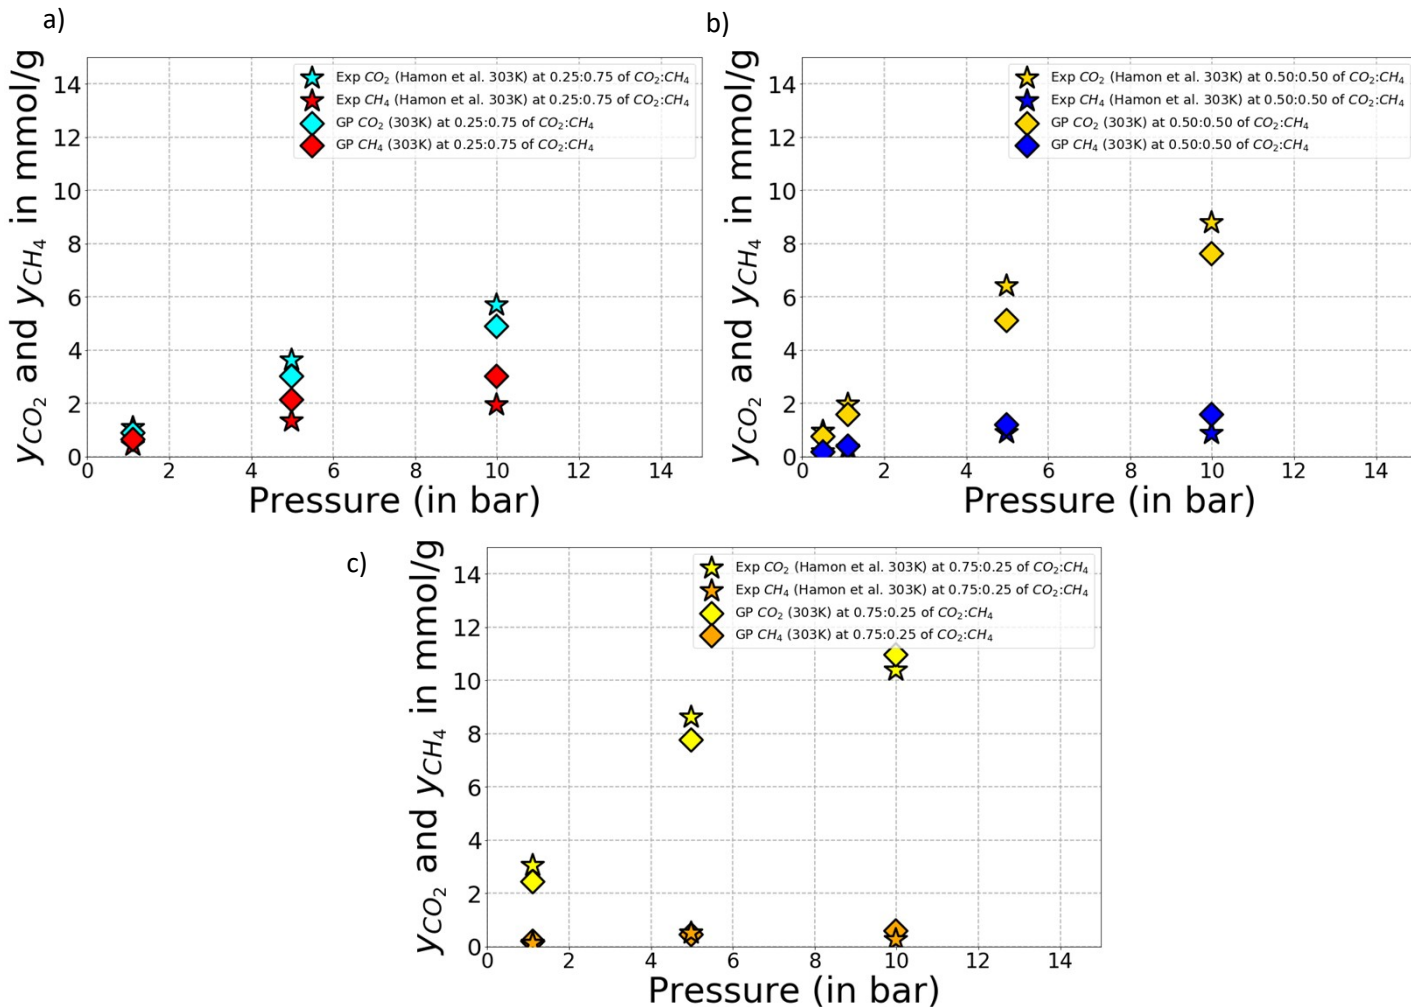

Figure S27. Comparing GP predicted  $\text{CO}_2$  and  $\text{CH}_4$  uptakes with experimental values for different ratios of  $\text{CO}_2$  and  $\text{CH}_4$  at 303K. Plot a) 0.25: 0.75 of  $\text{CO}_2$ : $\text{CH}_4$ , b) 0.50: 0.50 of  $\text{CO}_2$ : $\text{CH}_4$ , and c) 0.75: 0.25 of  $\text{CO}_2$ : $\text{CH}_4$ . The GPs here were trained using AL for P-X-T for the  $\text{CO}_2$ - $\text{CH}_4$  mixture and it was terminated at PAC cut-off of 90%. We find very close agreement with GP predictions and experimental data. It is to be noted that the GPs were trained on GCMC data. Also, the experimental data was taken from Hamon et al and the BISON dataset by Cai and coworkers was useful to obtain the data points. [1, 2]

## References

1. L. Hamon, E. Jolimaître and G. D. Pirngruber, *Industrial & Engineering Chemistry Research*, 2010, 49, 7497–7503.

2. X. Cai, F. Gharagheizi, L. W. Bingel, D. Shade, K. S. Walton, and D. S. Sholl, *Industrial & Engineering Chemistry Research*, 2021, 60, 639–651.
